# Supplementary material for: Comparative analyses of longevity and senescence reveal variable survival benefits of living in zoos across mammals
Source: PubMed Central journal article supplement (PMC5098244; doi:10.1038/srep36361), 2016-11-07
Supplement: srep36361-s1.pdf [file srep36361-s1.pdf]

## Supplementary Information

### **Comparative analyses of longevity and senescence reveal variable survival benefits of living in zoos across mammals**

Morgane Tidière<sup>1,\*</sup>, Jean-Michel Gaillard<sup>1</sup>, Véra Berger<sup>1</sup>, Dennis W.H. Müller<sup>2</sup>, Laurie Bingaman Lackey<sup>3</sup>, Olivier Gimenez<sup>4</sup>, Marcus Clauss<sup>5</sup> and Jean-François Lemaître<sup>1</sup>

<sup>1</sup>Université de Lyon, F-69000, Lyon; Université Lyon 1; CNRS, UMR5558, Laboratoire de Biométrie et Biologie Evolutive, F-69622, Villeurbanne, France.

<sup>2</sup>Zoologischer Garten Halle GmbH, Fasanenstr. 5a, 06114 Halle (Saale), Germany.

<sup>3</sup>World Association of Zoos and Aquariums (WAZA), Gland, Switzerland.

<sup>4</sup>UMR 5175, Centre d'Ecologie Fonctionnelle et Evolutive, campus CNRS, 1919 route de Mende, 34293, Montpellier Cedex 5, France.

<sup>5</sup>Clinic for Zoo Animals, Exotic Pets and Wildlife, Vetsuisse Faculty, University of Zurich, Winterthurerstr. 260, 8057 Zurich, Switzerland.

\* **Corresponding author:** mtidiere@gmail.com

**Table S1:** Survival and senescence data in males (M, N=53) and females (F, N=58) obtained from zoo and free-ranging populations of mammalian species. Data quality is indicated for free-ranging populations coded as factor with longitudinal (0) and transversal (1) data.

| Species                       | Order        | SURVIVAL AND ACTUARIAL SENESCENCE DATA FROM ZOO POPULATIONS |     |                                                          |           |                   |    |                    |       |                             |   | SURVIVAL AND ACTUARIAL SENESCENCE DATA FROM FREE-RANGING POPULATIONS |       |              |                   |    |                    |       |                             |    |                    |       |                                      |
|-------------------------------|--------------|-------------------------------------------------------------|-----|----------------------------------------------------------|-----------|-------------------|----|--------------------|-------|-----------------------------|---|----------------------------------------------------------------------|-------|--------------|-------------------|----|--------------------|-------|-----------------------------|----|--------------------|-------|--------------------------------------|
|                               |              | Number of individuals alive at 1 year of age                |     | First to last extinct cohorts included in the life table |           | Longevity (years) |    | Baseline mortality |       | Onset of senescence (years) |   | Rate of senescence                                                   |       | Data quality | Longevity (years) |    | Baseline mortality |       | Onset of senescence (years) |    | Rate of senescence |       | Nm, Nf* ; Wild life table references |
|                               |              | M                                                           | F   | M                                                        | F         | M                 | F  | M                  | F     | M                           | F | M                                                                    | F     |              | M                 | F  | M                  | F     | M                           | F  | M                  | F     |                                      |
| <i>Acinonyx jubatus</i>       | Carnivora    | 739                                                         | 725 | 1968-2000                                                | 1973-2000 | 14                | 14 | 0.042              | 0.036 | 2                           | 2 | 0.103                                                                | 0.107 | 0            | 4                 | 11 | 0.400              | 0.100 | 2                           | 2  | 0.407              | 0.044 | 124, 160; 1                          |
| <i>Aepyceros melampus</i>     | Artiodactyla | 310                                                         | 593 | 1962-2001                                                | 1961-1999 | 10                | 14 | 0.171              | 0.059 | 7                           | 4 | 0.104                                                                | 0.090 | 1            | 9                 | 9  | 0.038              | 0.045 | 2                           | 2  | 0.200              | 0.168 | 334, 116; 2                          |
| <i>Alces alces</i>            | Artiodactyla | 101                                                         | 132 | 1952-1994                                                | 1929-1997 | 11                | 12 | 0.102              | 0.087 | 5                           | 3 | 0.090                                                                | 0.042 | 0            | 10                | 17 | 0.129              | 0.047 | 2                           | 9  | 0.052              | 0.163 | 288, 532; 3                          |
| <i>Antilocapra americana</i>  | Artiodactyla | 160                                                         | 230 | 1911-1996                                                | 1911-2000 | 9                 | 10 | 0.163              | 0.168 | 7                           | 2 | 0.130                                                                | 0.024 | 0            | 11                | 15 | 0.025              | 0.011 | 2                           | 2  | 0.189              | 0.119 | 840, 840; 4                          |
| <i>Arctocephalus pusillus</i> | Carnivora    | 36                                                          | 28  | 1964-1995                                                | 1962-1993 | 14                | 20 | 0.045              | 0.048 | 5                           | 4 | 0.124                                                                | 0.057 | 1            | NA                | 15 | NA                 | 0.040 | NA                          | 6  | NA                 | 0.143 | 66; 5                                |
| <i>Bos gaurus</i>             | Artiodactyla | 110                                                         | 121 | 1940-1999                                                | 1942-1994 | 15                | 18 | 0.043              | 0.046 | 7                           | 6 | 0.082                                                                | 0.062 | 1            | 10                | 17 | 0.031              | 0.050 | 3                           | 6  | 0.203              | 0.067 | 72, 58; 6                            |
| <i>Bos javanicus</i>          | Artiodactyla | 96                                                          | 113 | 1951-1999                                                | 1950-1994 | 14                | 19 | 0.071              | 0.049 | 4                           | 3 | 0.058                                                                | 0.041 | 1            | NA                | 12 | NA                 | 0.050 | NA                          | 10 | NA                 | 98; 7 |                                      |
| <i>Capra aegagrus</i>         | Artiodactyla | 131                                                         | 192 | 1966-2000                                                | 1966-1997 | 12                | 13 | 0.065              | 0.058 | 3                           | 3 | 0.069                                                                | 0.086 | 1            | 9                 | 11 | 0.213              | 0.073 | 5                           | 4  | 0.043              | 0.064 | 106, 159; 8                          |
| <i>Capra ibex</i>             | Artiodactyla | 183                                                         | 290 | 1926-1997                                                | 1928-1997 | 14                | 15 | 0.074              | 0.059 | 6                           | 5 | 0.098                                                                | 0.058 | 0            | 15                | 20 | 0.012              | 0.018 | 4                           | 4  | 0.174              | 0.043 | 215, 117; 9                          |
| <i>Capreolus capreolus</i>    | Artiodactyla | 75                                                          | 101 | 1953-2003                                                | 1964-2003 | 8                 | 10 | 0.188              | 0.131 | 6                           | 3 | 0.318                                                                | 0.058 | 0            | 10                | 14 | 0.121              | 0.036 | 4                           | 3  | 0.106              | 0.089 | 829, 834; 10                         |
| <i>Castor canadensis</i>      | Rodentia     | 82                                                          | 79  | 1934-1994                                                | 1954-1995 | 16                | 17 | 0.092              | 0.089 | 4                           | 6 | 0.025                                                                | 0.055 | 1            | 6                 | 7  | 0.280              | 0.211 | 2                           | 5  | NA                 | 0.043 | 362, 249; 11                         |
| <i>Cebus capucinus</i>        | Primates     | 31                                                          | 33  | 1921-1997                                                | 1925-1992 | 11                | 13 | 0.246              | 0.115 | 8                           | 5 | 0.086                                                                | 0.065 | 0            | 14                | 26 | 0.008              | 0.009 | 10                          | 19 | 0.615              | 0.165 | 98, 194; 12                          |
| <i>Cercopithecus mitis</i>    | Primates     | 25                                                          | 25  | 1964-1996                                                | 1967-1992 | 11                | 12 | 0.151              | 0.106 | 5                           | 5 | 0.083                                                                | 0.085 | 0            | 19                | 30 | 0.008              | 0.019 | 11                          | 9  | 0.011              | 0.058 | 128, 58; 12                          |
| <i>Cervus canadensis</i>      | Artiodactyla | 299                                                         | 478 | 1920-1997                                                | 1920-1992 | 16                | 19 | 0.079              | 0.042 | 5                           | 4 | 0.049                                                                | 0.056 | 1            | 6                 | 13 | 0.297              | 0.091 | 3                           | 9  | 0.060              | 0.219 | **; 13-15                            |
| <i>Cervus elaphus</i>         | Artiodactyla | 230                                                         | 382 | 1904-1997                                                | 1905-1993 | 14                | 16 | 0.081              | 0.042 | 6                           | 4 | 0.080                                                                | 0.078 | 0            | 13                | 17 | 0.023              | 0.031 | 5                           | 3  | 0.221              | 0.095 | 767, 738; 16                         |
| <i>Cervus eldi</i>            | Artiodactyla | 272                                                         | 316 | 1909-2000                                                | 1906-1998 | 14                | 17 | 0.071              | 0.043 | 3                           | 8 | 0.082                                                                | 0.128 | 0            | 9                 | 9  | 0.043              | 0.191 | 2                           | 2  | 0.109              | 0.056 | 47, 49; 17                           |
| <i>Cervus nippon</i>          | Artiodactyla | 550                                                         | 774 | 1906-1995                                                | 1905-1994 | 13                | 17 | 0.132              | 0.062 | 6                           | 3 | 0.032                                                                | 0.042 | 0            | 12                | 14 | 0.021              | 0.015 | 4                           | 4  | 0.148              | 0.161 | 149, 127; 18                         |

|                                 |                |     |     |           |           |    |    |       |       |    |    |       |       |   |    |    |       |       |    |    |       |       |                 |                |
|---------------------------------|----------------|-----|-----|-----------|-----------|----|----|-------|-------|----|----|-------|-------|---|----|----|-------|-------|----|----|-------|-------|-----------------|----------------|
| <i>Connochaetes taurinus</i>    | Artiodactyla   | 217 | 348 | 1925-1993 | 1933-1985 | 15 | 17 | 0.073 | 0.064 | 6  | 3  | 0.060 | 0.050 | 1 | 11 | 13 | 0.182 | 0.076 | 3  | 10 | 0.024 | 0.182 | 202, 211; 19    |                |
| <i>Crocota crocota</i>          | Carnivora      | 34  | 40  | 1920-1983 | 1930-1993 | 16 | 15 | 0.070 | 0.029 | 5  | 4  | 0.073 | 0.073 | 0 | 3  | 14 | 0.595 | 0.072 | 2  | 7  | NA    | 0.077 | 97, 97.; 20     |                |
| <i>Dama dama</i>                | Artiodactyla   | 516 | 828 | 1910-1994 | 1911-1991 | 11 | 15 | 0.153 | 0.068 | 3  | 3  | 0.038 | 0.052 | 0 | 15 | 16 | 0.003 | 0.019 | 7  | 9  | 0.146 | 0.095 | 25, 25; 21      |                |
| <i>Damaliscus korrigum</i>      | Artiodactyla   | 50  | 69  | 1967-1999 | 1966-1996 | 13 | 13 | 0.065 | 0.069 | 3  | 2  | 0.072 | 0.077 | 1 | 5  | 5  | 0.287 | 0.291 | 2  | 2  | 0.268 | 0.309 | 308, 188; 22    |                |
| <i>Equus burchellii</i>         | Perissodactyla | 341 | 749 | 1901-1988 | 1900-1985 | 22 | 25 | 0.060 | 0.041 | 7  | 7  | 0.036 | 0.040 | 1 | 17 | 16 | 0.043 | 0.051 | 6  | 8  | 0.093 | 0.070 | 67, 61; 2       |                |
| <i>Erythrocebus patas</i>       | Primates       | 145 | 187 | 1949-1993 | 1948-1987 | 19 | 22 | 0.064 | 0.045 | 9  | 5  | 0.056 | 0.033 | 0 | NA | 8  | NA    | NA    | NA | NA | NA    | NA    | NA              | 120; 23        |
| <i>Helogale parvula</i>         | Carnivora      | 140 | 109 | 1963-1998 | 1963-2000 | 14 | 15 | 0.051 | 0.048 | 2  | 3  | 0.077 | 0.079 | 0 | 7  | 7  | 0.185 | 0.214 | 2  | 2  | 0.070 | 0.082 | 444, 402; 24    |                |
| <i>Hemitragus jemlahicus</i>    | Artiodactyla   | 278 | 380 | 1905-1993 | 1906-1994 | 14 | 16 | 0.097 | 0.063 | 6  | 4  | 0.077 | 0.055 | 1 | NA | 12 | NA    | 0.056 | NA | 2  | NA    | 0.089 |                 | 55; 25         |
| <i>Kobus ellipsiprymnus</i>     | Artiodactyla   | 246 | 425 | 1939-1994 | 1938-1995 | 17 | 20 | 0.068 | 0.041 | 6  | 5  | 0.065 | 0.072 | 1 | 9  | 12 | 0.021 | 0.050 | 3  | 6  | 0.311 | 0.434 | 99, 100; 26     |                |
| <i>Kobus kob</i>                | Artiodactyla   | 40  | 77  | 1941-2000 | 1939-2000 | 10 | 15 | 0.042 | 0.031 | 4  | 4  | 0.131 | 0.098 | 1 | 6  | NA | 0.094 | NA    | 1  | NA | 0.216 | NA    | 340; 22         |                |
| <i>Kobus leche</i>              | Artiodactyla   | 202 | 328 | 1910-1993 | 1961-1991 | 12 | 17 | 0.126 | 0.047 | 4  | 7  | 0.039 | 0.073 | 1 | 9  | 8  | 0.072 | 0.071 | 3  | 3  | 0.210 | 0.224 | **; 27          |                |
| <i>Lutra lutra</i>              | Carnivora      | 86  | 94  | 1961-1997 | 1971-2000 | 14 | 15 | 0.063 | 0.071 | 4  | 6  | 0.085 | 0.078 | 1 | 6  | 7  | 0.317 | 0.129 | 2  | 3  | 0.031 | 0.218 | 37, 36; 28      |                |
| <i>Lycyon pictus</i>            | Carnivora      | 480 | 437 | 1938-2002 | 1938-1994 | 12 | 11 | 0.045 | 0.057 | 3  | 3  | 0.176 | 0.144 | 0 | 8  | 7  | 0.135 | 0.247 | 3  | 2  | 0.072 | 0.036 | 101, 97; 29     |                |
| <i>Lynx rufus</i>               | Carnivora      | 64  | 42  | 1952-1985 | 1959-1987 | 19 | 17 | 0.022 | 0.040 | 6  | 1  | 0.076 | 0.046 | 1 | 4  | 5  | NA    | 0.141 | NA | 4  | NA    | NA    |                 | 80, 81; 30     |
| <i>Macaca fascicularis</i>      | Primates       | 129 | 136 | 1927-1991 | 1924-1985 | 21 | 26 | 0.060 | 0.030 | 16 | 13 | 0.145 | 0.057 | 0 | NA | 22 | NA    | 0.010 | NA | 9  | NA    | 0.130 |                 | 184; 31        |
| <i>Macaca mulatta</i>           | Primates       | 63  | 159 | 1911-1991 | 1939-1985 | 18 | 25 | 0.054 | 0.033 | 8  | 8  | 0.075 | 0.050 | 0 | 12 | 17 | 0.077 | 0.036 | 7  | 7  | 0.033 | 0.098 | 44, 43; 32      |                |
| <i>Macropus agilis</i>          | Diprotodontia  | 157 | 182 | 1954-2001 | 1951-2001 | 8  | 9  | 0.243 | 0.176 | 2  | 1  | 0.026 | 0.053 | 1 | 9  | 14 | 0.074 | 0.123 | 2  | 8  | 0.173 | NA    | 152, 152; 33    |                |
| <i>Meles meles</i>              | Carnivora      | 30  | 29  | 1972-1997 | 1972-1998 | 14 | 11 | 0.038 | 0.036 | 3  | 1  | 0.107 | 0.111 | 0 | 7  | 8  | 0.250 | 0.177 | 4  | 4  | 0.142 | 0.125 | 223, 307; 34,35 |                |
| <i>Mephitis mephitis</i>        | Carnivora      | 115 | 135 | 1908-2003 | 1908-2004 | 8  | 8  | 0.049 | 0.122 | 2  | 3  | 0.275 | 0.188 | 1 | 3  | 4  | 0.418 | 0.485 | 1  | 2  | 0.326 | 0.132 | 198, 181; 36    |                |
| <i>Muscardinus avellanarius</i> | Rodentia       | 58  | 51  | 1990-2008 | 1988-2007 | 5  | 5  | 0.317 | 0.205 | 1  | 2  | 0.092 | 0.287 | 0 | 3  | 2  | 0.569 | 0.738 | 2  | 1  | NA    | NA    | 598, 470; 37    |                |
| <i>Mustela erminea</i>          | Carnivora      | 32  | 37  | 1973-2006 | 1973-2005 | 9  | 9  | 0.152 | 0.131 | 1  | 1  | 0.088 | 0.057 | 0 | 3  | 2  | 0.533 | 0.618 | 1  | 1  | 0.168 | NA    | 75, 67; 38      |                |
| <i>Mustela putorius</i>         | Carnivora      | 45  | 44  | 1982-2008 | 1976-1997 | 6  | 8  | 0.067 | 0.136 | 1  | 3  | 0.284 | 0.191 | 1 | 3  | 2  | 0.323 | 0.324 | 1  | 1  | 0.373 | NA    | 133, 65; 39     |                |
| <i>Mustela vison</i>            | Carnivora      | 25  | 28  | 1977-2006 | 1951-2004 | 6  | 10 | 0.186 | 0.150 | 2  | 3  | 0.204 | 0.073 | 1 | 4  | 4  | 0.333 | 0.349 | 3  | 2  | NA    | NA    | 36, 30; 40      |                |
| <i>Nyctereutes procyonoides</i> | Carnivora      | 82  | 87  | 1948-2004 | 1950-2000 | 11 | 11 | 0.061 | 0.046 | 2  | 1  | 0.158 | 0.123 | 1 | 4  | 4  | 0.394 | 0.395 | 3  | 3  | NA    | NA    | 133, 136; 41,42 |                |
| <i>Odocoileus hemionus</i>      | Artiodactyla   | 66  | 103 | 1906-2002 | 1918-1998 | 11 | 12 | 0.122 | 0.094 | 5  | 6  | 0.083 | 0.130 | 0 | 8  | 9  | 0.146 | 0.161 | 5  | 2  | 0.159 | 0.019 | **; 43          |                |
| <i>Odocoileus virginianus</i>   | Artiodactyla   | 206 | 330 | 1903-1990 | 1903-1990 | 14 | 15 | 0.137 | 0.090 | 11 | 3  | 0.069 | 0.040 | 1 | 4  | 6  | 0.433 | 0.329 | 2  | 1  | 0.196 | 0.037 | **; 44          |                |
| <i>Oryctolagus cuniculus</i>    | Lagomorpha     | 293 | 354 | 1950-1998 | 1951-2005 | 8  | 8  | 0.166 | 0.168 | 2  | 3  | 0.092 | 0.138 | 1 | 3  | 3  | NA    | 0.550 | NA | 3  | NA    | 0.058 |                 | 9020, 8306; 45 |
| <i>Ovis aries</i>               | Artiodactyla   | 420 | 471 | 1918-1996 | 1919-1986 | 13 | 15 | 0.110 | 0.074 | 5  | 2  | 0.029 | 0.049 | 0 | 8  | 10 | 0.198 | 0.109 | 7  | 4  | NA    | 0.120 | 655, 667; 46,47 |                |

|                                              |              |     |      |           |           |    |    |       |       |    |    |       |       |   |     |     |       |       |     |     |       |         |                   |
|----------------------------------------------|--------------|-----|------|-----------|-----------|----|----|-------|-------|----|----|-------|-------|---|-----|-----|-------|-------|-----|-----|-------|---------|-------------------|
| <i>Ovis canadensis</i>                       | Artiodactyla | 229 | 247  | 1922-2000 | 1928-1998 | 11 | 16 | 0.130 | 0.080 | 3  | 3  | 0.049 | 0.057 | 0 | 9   | 14  | 0.133 | 0.071 | 3   | 4   | 0.115 | 0.083   | 404, 402; 48      |
| <i>Pan troglodytes</i>                       | Primates     | 122 | 178  | 1921-1975 | 1926-1969 | 30 | 37 | 0.059 | 0.045 | 8  | 28 | 0.006 | 0.037 | 0 | 36  | 44  | 0.019 | 0.015 | 18  | 16  | 0.054 | 0.030   | 122, 144; 12      |
| <i>Panthera leo</i>                          | Carnivora    | 966 | 1247 | 1900-1991 | 1900-1989 | 19 | 20 | 0.030 | 0.033 | 8  | 7  | 0.100 | 0.086 | 0 | 11  | 14  | 0.022 | 0.073 | 9   | 5   | 0.283 | 0.096   | **; 49            |
| <i>Pecari tajacu</i>                         | Artiodactyla | 147 | 180  | 1910-1990 | 1935-1992 | 18 | 18 | 0.068 | 0.037 | 8  | 4  | 0.069 | 0.051 | 1 | 6   | 7   | 0.306 | NA    | 4   | NA  | 0.016 | NA      | **; 50            |
| <i>Rangifer tarandus</i>                     | Artiodactyla | 217 | 295  | 1924-2001 | 1924-1995 | 10 | 14 | 0.126 | 0.061 | 2  | 2  | 0.075 | 0.087 | 1 | 6   | 9   | 0.212 | 0.064 | 2   | 2   | 0.173 | 0.158   | 228, 160; 51,52   |
| <i>Rupicapra rupicapra</i>                   | Artiodactyla | 68  | 121  | 1969-2001 | 1914-2000 | 13 | 14 | 0.130 | 0.067 | 4  | 4  | 0.038 | 0.107 | 1 | 11  | 12  | 0.048 | 0.068 | 3   | 2   | 0.117 | 0.083   | 508, 359; 53      |
| <i>Sus scrofa</i>                            | Artiodactyla | 166 | 260  | 1940-2000 | 1943-1999 | 14 | 14 | 0.040 | 0.078 | 5  | 7  | 0.092 | 0.072 | 0 | 7   | 10  | 0.270 | 0.159 | 5   | 3   | 0.026 | 0.042   | 930, 853; 54      |
| <i>Syncerus caffer</i>                       | Artiodactyla | 120 | 174  | 1929-1992 | 1930-1991 | 21 | 23 | 0.020 | 0.022 | 12 | 8  | 0.111 | 0.074 | 1 | 16  | 14  | 0.030 | 0.075 | 5   | 7   | 0.120 | 0.138   | 172, 100; 2,22,55 |
| <i>Theropithecus gelada</i>                  | Primates     | 74  | 101  | 1955-1991 | 1956-1989 | 22 | 26 | 0.043 | 0.019 | 10 | 10 | 0.044 | 0.072 | 1 | 10  | 11  | 0.123 | 0.119 | 6   | 5   | 0.208 | 0.136   | 301, 354; 56      |
| <i>Tragelaphus strepsiceros</i>              | Artiodactyla | 391 | 660  | 1949-2000 | 1932-1992 | 10 | 14 | 0.095 | 0.078 | 2  | 3  | 0.097 | 0.069 | 0 | 8   | 13  | 0.197 | 0.028 | 3   | 6   | 0.128 | 0.167   | **; 57            |
| <i>Tupaia glis</i>                           | Scandentia   | 200 | 195  | 1965-2004 | 1965-2005 | 7  | 7  | 0.136 | 0.147 | 2  | 2  | 0.169 | 0.137 | 1 | 1.7 | 1.8 | 0.035 | 0.043 | 0.5 | 0.3 | 0.916 | 0.365   | **; 58            |
| <i>Urocyon cinereoargenteus</i>              | Carnivora    | 25  | 27   | 1964-2005 | 1972-2001 | 6  | 13 | 0.133 | 0.066 | 2  | 4  | 0.315 | 0.125 | 1 | NA  | 5   | NA    | 0.228 | NA  | 5.0 | NA    | 0.181   | **; 59            |
| <i>Vulpes vulpes</i>                         | Carnivora    | 56  | 59   | 1945-1998 | 1954-2003 | 11 | 13 | 0.045 | 0.056 | 3  | 5  | 0.152 | 0.155 | 0 | 3.5 | 3.8 | 0.010 | 0.025 | 3.1 | 1.3 | 2.598 | 0.204   | 336, 249; 60      |
| <i>Zalophus californianus</i>                | Carnivora    | 178 | 217  | 1913-1990 | 1911-1967 | 24 | 25 | 0.034 | 0.029 | 9  | 8  | 0.051 | 0.057 | 0 | 15  | 18  | 0.075 | 0.018 | 6   | 8   | 0.055 | 0.164   | 96, 94; 61        |
| Species included for visual comparison only: |              |     |      |           |           |    |    |       |       |    |    |       |       |   |     |     |       |       |     |     |       |         |                   |
| <i>Elephas maximus</i>                       | Proboscidea  | 484 |      | 1960-2005 |           | -  | 60 | -     | 0.013 | -  | 13 | -     | 0.014 | - | -   | 63  | -     | 0.010 | -   | 28  | -     | 0.026   | 2905; 62†         |
| <i>Loxodonta africana</i>                    | Proboscidea  | 302 |      | 1960-2005 |           | -  | 45 | -     | 0.019 | -  | 12 | -     | 0.025 | - | -   | 71  | -     | 0.009 | -   | 21  | -     | 0.023   | 1089; 63          |
| <i>Hippopotamus amphibius</i> ††             | Artiodactyla | 115 |      | 1961-1966 |           | 47 |    | 0.019 |       | 11 |    | 0.027 |       | - | 39  |     | 0.017 |       | 13  |     | 0.026 | 207; 64 |                   |

\* number of individuals included in life table for males and females respectively; \*\* the number of individuals included in life table is unknown and arbitrarily fixed to 100 per sex

† data from work-camp elephants ; †† data for both sexes combined (because data for free-ranging animals not separated by sex)

**Table S2:** Data on age at sexual maturity and mean sex-specific adult body mass (BM) of the mammalian species included in the analyses. Age at sexual maturity was obtained from De Magalhães and Costa (2009).

| Species                       | Order          | Age at sexual maturity (years) |         | Mean adult body mass (kg) |         | Reference for mean adult body mass |
|-------------------------------|----------------|--------------------------------|---------|---------------------------|---------|------------------------------------|
|                               |                | males                          | females | males                     | females |                                    |
| <i>Acinonyx jubatus</i>       | Carnivora      | 1.25                           | 1.25    | 42.3                      | 37.9    | 65                                 |
| <i>Aepyceros melampus</i>     | Artiodactyla   | 1.08                           | 1.25    | 56.9                      | 43.8    | 66                                 |
| <i>Alces alces</i>            | Artiodactyla   | 1.68                           | 2.06    | 241.45                    | 187.16  | 67                                 |
| <i>Antilocapra americana</i>  | Artiodactyla   | 1.5                            | 1.5     | 54                        | 45.4    | 68                                 |
| <i>Arctocephalus pusillus</i> | Carnivora      | 4.5                            | 3.49    | 321                       | 95      | 69                                 |
| <i>Bos gaurus</i>             | Artiodactyla   | 1.51                           | 1.62    | 880                       | 590     | 68                                 |
| <i>Bos javanicus</i>          | Artiodactyla   | 2                              | 2       | 750                       | 450     | 70                                 |
| <i>Capra aegagrus</i>         | Artiodactyla   | 1.88                           | 1.11    | 33.8                      | 20.125  | 68                                 |
| <i>Capra ibex</i>             | Artiodactyla   | 3.44                           | 2.18    | 80.5                      | 48.9    | 66                                 |
| <i>Capreolus capreolus</i>    | Artiodactyla   | 1.79                           | 1.13    | 28                        | 26.5    | 71                                 |
| <i>Castor canadensis</i>      | Rodentia       | 1.75                           | 1.75    | 36.6                      | 36.4    | 72                                 |
| <i>Cebus capucinus</i>        | Primates       | 8                              | 4.12    | 3.23                      | 2.28    | 12                                 |
| <i>Cercopithecus mitis</i>    | Primates       | 4.58                           | 4.58    | 6.8                       | 4.2     | 12                                 |
| <i>Cervus canadensis</i>      | Artiodactyla   | 2                              | 2.33    | 312                       | 238.667 | 73                                 |
| <i>Cervus elaphus</i>         | Artiodactyla   | 2                              | 2.33    | 250                       | 125     | 71                                 |
| <i>Cervus eldii</i>           | Artiodactyla   | 1.39                           | 1.39    | 105                       | 67      | 71                                 |
| <i>Cervus nippon</i>          | Artiodactyla   | 1.37                           | 1.37    | 52                        | 37      | 71                                 |
| <i>Connochaetes taurinus</i>  | Artiodactyla   | 2.5                            | 1.13    | 235.3                     | 184.9   | 66                                 |
| <i>Crocuta crocuta</i>        | Carnivora      | 1.89                           | 3       | 80.2                      | 73.6    | 72                                 |
| <i>Dama dama</i>              | Artiodactyla   | 1.39                           | 1.33    | 67                        | 44      | 71                                 |
| <i>Damaliscus korrigum</i>    | Artiodactyla   | 1.75                           | 1.75    | 137                       | 120.1   | 70                                 |
| <i>Equus burchellii</i>       | Perissodactyla | 2.46                           | 2.46    | 250                       | 220     | 74                                 |
| <i>Erythrocebus patas</i>     | Primates       | 3.83                           | 2.62    | 10                        | 5.6     | 75                                 |
| <i>Helogale parvula</i>       | Carnivora      | 1.25                           | 1.25    | 0.221                     | 0.201   | 72                                 |
| <i>Hemitragus jemlahicus</i>  | Artiodactyla   | 2                              | 1.5     | 103.3                     | 56      | 66                                 |
| <i>Kobus ellipsiprymnus</i>   | Artiodactyla   | 2.11                           | 2.11    | 231                       | 174     | 75                                 |
| <i>Kobus kob</i>              | Artiodactyla   | 1                              | 1.1     | 97.5                      | 61.9    | 66                                 |
| <i>Kobus leche</i>            | Artiodactyla   | 2.87                           | 2.46    | 104.3                     | 78.7    | 66                                 |
| <i>Lutra lutra</i>            | Carnivora      | 1.5                            | 1.5     | 10.3                      | 7.4     | 76                                 |
| <i>Lycaon pictus</i>          | Carnivora      | 1.75                           | 1.75    | 21.8                      | 22.3    | 72                                 |
| <i>Lynx rufus</i>             | Carnivora      | 2                              | 1       | 12                        | 9       | 76                                 |
| <i>Macaca fascicularis</i>    | Primates       | 4.23                           | 3.39    | 5.9                       | 4.1     | 75                                 |
| <i>Macaca mulatta</i>         | Primates       | 5.49                           | 3.37    | 6.2                       | 3       | 75                                 |
| <i>Macropus agilis</i>        | Diprotodontia  | 1.16                           | 1       | 19                        | 11      | 75                                 |
| <i>Meles meles</i>            | Carnivora      | 1                              | 1       | 11.6                      | 10      | 76                                 |

|                                 |              |      |      |       |       |    |
|---------------------------------|--------------|------|------|-------|-------|----|
| <i>Mephitis mephitis</i>        | Carnivora    | 0.92 | 0.92 | 2.6   | 2     | 76 |
| <i>Muscardinus avellanarius</i> | Rodentia     | 0.92 | 0.92 | 0.033 | 0.033 | 76 |
| <i>Mustela erminea</i>          | Carnivora    | 1    | 0.26 | 0.321 | 0.213 | 76 |
| <i>Mustela putorius</i>         | Carnivora    | 0.88 | 0.85 | 0.987 | 0.623 | 76 |
| <i>Mustela vison</i>            | Carnivora    | 1.02 | 0.91 | 1.25  | 0.9   | 76 |
| <i>Nyctereutes procyonoides</i> | Carnivora    | 0.83 | 0.83 | 3.47  | 3.8   | 77 |
| <i>Odocoileus hemionus</i>      | Artiodactyla | 1.38 | 1.31 | 112.5 | 55.5  | 71 |
| <i>Odocoileus virginianus</i>   | Artiodactyla | 1.14 | 0.85 | 154.5 | 68.5  | 71 |
| <i>Oryctolagus cuniculus</i>    | Lagomorpha   | 2    | 2    | 1.57  | 1.59  | 76 |
| <i>Ovis aries</i>               | Artiodactyla | 2.5  | 1.5  | 26    | 20    | 75 |
| <i>Ovis canadensis</i>          | Artiodactyla | 2.05 | 1.94 | 100   | 57.9  | 72 |
| <i>Pan troglodytes</i>          | Primates     | 7.99 | 9.24 | 39    | 31.3  | 12 |
| <i>Panthera leo</i>             | Carnivora    | 3    | 3    | 190   | 126   | 78 |
| <i>Pecari tajacu</i>            | Artiodactyla | 0.98 | 0.9  | 20    | 22    | 72 |
| <i>Rangifer tarandus</i>        | Artiodactyla | 1.86 | 1.81 | 106.5 | 76    | 71 |
| <i>Rupicapra rupicapra</i>      | Artiodactyla | 1.83 | 1.85 | 40.3  | 31.7  | 66 |
| <i>Sus scrofa</i>               | Artiodactyla | 0.19 | 0.91 | 90    | 70    | 76 |
| <i>Syncerus caffer</i>          | Artiodactyla | 4.58 | 4.04 | 642.9 | 467.5 | 66 |
| <i>Theropithecus gelada</i>     | Primates     | 6    | 3.81 | 20.5  | 13.6  | 75 |
| <i>Tragelaphus strepsiceros</i> | Artiodactyla | 1.42 | 1.42 | 240.8 | 159.2 | 66 |
| <i>Tupaia glis</i>              | Scandentia   | 0.25 | 0.25 | 0.112 | 0.123 | 72 |
| <i>Urocyon cinereoargenteus</i> | Carnivora    | 1    | 0.94 | 4.4   | 4.01  | 72 |
| <i>Vulpes vulpes</i>            | Carnivora    | 0.83 | 0.83 | 5.85  | 5.2   | 76 |
| <i>Zalophus californianus</i>   | Carnivora    | 5    | 3    | 392.5 | 110.6 | 76 |

## References for Tables S1 and S2:

1. Kelly, M. J. *et al.* Demography of the Serengeti cheetah (*Acinonyx jubatus*) population: the first 25 years. *J. Zool.* **244**, 473–488 (1998).
2. Spinge, C. A. African ungulate life table. *Ecology* **53**, 645–652 (1972).
3. Ericsson, G. & Wallin, K. Age-specific moose (*Alces alces*) mortality in a predator-free environment: evidence for senescence in females. *Ecoscience* **8**, 157–163 (2001).
4. Byers, J. A. *American Pronghorn: Social Adaptations & the Ghosts of Predators Past.* (1997).
5. Gibbens, J. & Arnould, J. P. Age-specific growth, survival, and population dynamics of female Australian fur seals. *Can. J. Zool.* **87**, 902–911 (2009).
6. Ahrestani, F. S., Iyer, S., Heitkönig, I. M. A. & Prins, H. H. T. Life-history traits of gaur *Bos gaurus*: a first analysis. *Mammal Rev.* **41**, 75–84 (2011).
7. Choquent, D. Growth, body condition and demography of wild banteng (*Bos javanicus*) on Cobourg Peninsula, northern Australia. *J. Zool.* **231**, 533–542 (1993).
8. Magomedov, M. R. D., Akhmedov, E. G. & Nazrullaev, N. I. Demographic structure of the bezoar goat, *Capra aegagrus* (Artiodactyla), population and regularities of its development in the eastern Caucasus. *Zool. Zhurnal* **83**, 234–240 (2004).
9. Toïgo, C. *et al.* Sex- and age-specific survival of the highly dimorphic Alpine ibex: evidence for a conservative life-history tactic. *J. Anim. Ecol.* **76**, 679–686 (2007).

10. Gaillard, J.-M., Viallefont, A., Loison, A. & Festa-Bianchet, M. Assessing senescence patterns in populations of large mammals. *Anim. Biodivers. Conserv.* **27**, 47–58 (2004).
11. Bergerud, A. T. & Miller, D. R. Population dynamics of Newfoundland beaver. *Can. J. Zool.* **55**, 1480–1492 (1977).
12. Bronikowski, A. M. *et al.* Aging in the natural world: comparative data reveal similar mortality patterns across primates. *Science* **331**, 1325–1328 (2011).
13. Knight, R. R. The sun river elk herd. *Wildl. Monogr.* 3–66 (1970).
14. Kimball, J. F. J. & Wolfe, M. L. Population analysis of a northern Utah elk herd. *J. Wildl. Manag.* **38**, 161–174 (1974).
15. Houston, D. B. *The Northern Yellowstone Elk: Ecology and Management.* (1982).
16. Catchpole, E. A., Fan, Y., Morgan, B. J., Clutton-Brock, T. H. & Coulson, T. Sexual dimorphism, survival and dispersal in red deer. *J. Agric. Biol. Environ. Stat.* **9**, 1–26 (2004).
17. Nie, H., Song, Y., Zeng, Z. & Zhang, Q. Life history pattern and fitness of an endangered Hainan Eld's deer population. *Integr. Zool.* **6**, 63–70 (2011).
18. McCullough, D. R., Takatsuki, S. & Kaji, K. *Sika Deer: Biology and Management of Native and Introduced Populations.* (Springer Science & Business Media, 2008).
19. Attwell, C. A. M. Population ecology of the blue wildebeest *Connochaetes taurinus taurinus* in Zululand, South Africa. *Afr. J. Ecol.* **20**, 147–168 (1982).
20. Frank, L. G., Holekamp, K. E. & Smale, L. in *Serengeti II: Dynamics, Management, and Conservation of an Ecosystem* **2**, 364–384 (Sinclair A.R.E & Arcese P., 1995).
21. Saltz, D. Minimizing extinction probability due to demographic stochasticity in a reintroduced herd of Persian fallow deer *Dama dama mesopotamica*. *Biol. Conserv.* **75**, 27–33 (1996).
22. Mertens, H. Structures de population et tables de survie des buffles, topis et cobs de Buffon au Parc National des Virunga, Zaïre. *Rev. Décologie* **40**, 33–51 (1985).
23. Nakagawa, N., Ohsawa, H. & Muroyama, Y. Life-history parameters of a wild group of West African patas monkeys (*Erythrocebus patas patas*). *Primates* **44**, 281–290 (2003).
24. Waser, P. M., Elliott, L. F., Creel, N. M. & Creel, S. R. in *Serengeti II: Dynamics, Management, and Conservation of an Ecosystem* 421–447 (Sinclair A.R.E & Arcese P., 1995).
25. Caughley, G. Mortality patterns in mammals. *Ecology* **47**, 906–918 (1966).
26. Spinage, C. A. Population dynamics of the Uganda defassa waterbuck (*Kobus defassa ugandae neumann*) in the Queen Elizabeth Park, Uganda. *J. Anim. Ecol.* **39**, 51–78 (1970).
27. Sayer, J. A. & Lavieren, L. P. V. The ecology of the Kafue lechwe population of Zambia before the operation of hydro-electric dams on the Kafue River. *Afr. J. Ecol.* **13**, 9–37 (1975).
28. Kruuk, H., Conroy, J. W. H. & Moorhouse, A. Seasonal reproduction, mortality and food of otters *Lutra lutra L.* in Shetland. in **58**, 263–278 (1987).
29. Creel, S. R. & Creel, N. M. *The African Wild Dog: Behavior, Ecology, and Conservation.* (2002).
30. Crowe, D. M. Aspects of ageing, growth, and reproduction of Bobcats from Wyoming. *J. Mammal.* **56**, 177–198 (1975).
31. van Noordwijk, M. A. & van Schaik, C. P. The effects of dominance rank and group size on female lifetime reproductive success in Wild Long-tailed Macaques, *Macaca fascicularis*. *Primates* **40**, 105–130 (1999).
32. Meikle, D. B. & Vessey, S. H. Maternal dominance rank and lifetime survivorship of male and female rhesus monkeys. *Behav. Ecol. Sociobiol.* **22**, 379–383 (1988).

33. Stirrat, S. C. Age structure, mortality and breeding in a population of agile wallabies (*Macropus agilis*). *Aust. J. Zool.* **56**, 431–439 (2008).
34. Rogers, L. M., Cheeseman, C. L., Mallinson, P. J. & Clifton-Hadley, R. The demography of a high-density badger (*Meles meles*) population in the west of England. *J. Zool.* **242**, 705–728 (1997).
35. Wilkinson, D. *et al.* The effects of bovine tuberculosis (*Mycobacterium bovis*) on mortality in a badger (*Meles meles*) population in England. *J. Zool.* **250**, 389–395 (2000).
36. Casey, G. A. & Webster, W. A. Age and sex determination of striped skunks (*Mephitis mephitis*) from Ontario, Manitoba, and Quebec. *Can. J. Zool.* **53**, 223–226 (1975).
37. Juškaitis, R. Life tables for the common dormouse *Muscardinus avellanarius* in Lithuania. *Acta Theriol. (Warsz.)* **44**, 465–470 (1999).
38. Erlinge, S. Demography and dynamics of a Stoat *Mustela erminea* population in a diverse community of vertebrates. *J. Anim. Ecol.* **52**, 705 (1983).
39. Kristiansen, L. V., Sunde, P., Nachman, G. & Madsen, A. B. Mortality and reproductive patterns of wild European polecats *Mustela putorius* in Denmark. *Acta Theriol. (Warsz.)* **52**, 371–378 (2007).
40. Bonesi, L., Harrington, L. A., Maran, T., Sidorovich, V. E. & Macdonald, D. W. Demography of three populations of American mink *Mustela vison* in Europe. *Mammal Rev.* **36**, 98–106 (2006).
41. Helle, E. & Kauhala, K. Age structure, mortality, and sex ratio of the Raccoon dog in Finland. *J. Mammal.* **74**, 936–942 (1993).
42. Kowalczyk, R., Zalewski, A., Jedrzejewska, B., Ansorge, H. & Bunevich, A. N. Reproduction and mortality of invasive raccoon dogs (*Nyctereutes procyonoides*) in the Bialowieza Primeval Forest (eastern Poland). *Ann. Zool. Fenn.* **46**, 291–301 (2009).
43. Taber, R. D. & Dasmann, R. F. The dynamics of three natural populations of the deer *Odocoileus hemionus columbianus*. *Ecology* **38**, 233–246 (1957).
44. McCullough, D. R. *The George Reserve Deer Herd: Population Ecology of a K-Selected Species*. (Ann Arbor, 1979).
45. Gibb, J. A., White, A. J. & Ward, C. P. Population ecology of rabbits in the Wairarapa, New Zealand. *N. Z. J. Ecol.* 55–82 (1985).
46. Catchpole, E. A., Morgan, B. J. T., Freeman, S. N., Albon, S. D. & Coulson, T. N. *An integrated analysis of Soay sheep survival data*. (University of Kent, 1998).
47. Coulson, T. N. & Crawley, M. J. in *Soay Sheep: Dynamics and Selection in an Island Population* 328–331 (Clutton-Brock T.H. & Pemberton J.M., 2004).
48. Loison, A., Festa-Bianchet, M., Gaillard, J.-M., Jorgenson, J. T. & Jullien, J.-M. Age-specific survival in five populations of ungulates: evidence of senescence. *Ecology* **80**, 2539–2554 (1999).
49. Packer, C. *et al.* in *Reproductive Success* 363–383 (Clutton-Brock T.H., 1988).
50. Hellgren, E. C., Synatzske, D. R., Oldenburg, P. W. & Guthery, F. S. Demography of a collared peccary population in south texas. *J. Wildl. Manag.* **59**, 153–163 (1995).
51. Reimers, E. Mortality in Svalbard reindeer. *Ecography* **6**, 141–149 (1983).
52. Leader-Williams, N. *Reindeer on South Georgia*. (1988).
53. Bocci, A., Canavese, G. & Lovari, S. Even mortality patterns of the two sexes in a polygynous, near-monomorphic species: is there a flaw? *J. Zool.* **280**, 379–386 (2010).
54. Gamelon, M. *et al.* Do age-specific survival patterns of wild boar fit current evolutionary theories of senescence? *Evolution* **68**, 3636–3643 (2014).
55. Sinclair, A. R. E. *The African Buffalo: A Study of Resource Limitation of Populations*. (1977).



56. Dunbar, R. I. M. Demographic and life history variables of a population of Gelada baboons (*Theropithecus gelada*). *J. Anim. Ecol.* **49**, 485 (1980).
57. Owen-smith, N. Demography of a large herbivore, the Greater kudu *Tragelaphus strepsiceros*, in relation to rainfall. *J. Anim. Ecol.* **59**, 893–913 (1990).
58. Langham, N. P. E. The ecology of the Common tree shrew, *Tupaia glis* in peninsular Malaysia. *J. Zool.* **197**, 323–344 (1982).
59. Wigal, R. A. & Chapman, J. A. Age determination, reproduction, and mortality of the gray fox (*Urocyon cinereoargenteus*) in Maryland, U.S.A. *Z. Säugetierkunde* 226–245 (1983).
60. Soulsbury, C. D., Baker, P. J., Iossa, G. & Harris, S. Fitness costs of dispersal in red foxes (*Vulpes vulpes*). *Behav. Ecol. Sociobiol.* **62**, 1289–1298 (2008).
61. Hernández-Camacho, C. J., Aurióles-Gamboa, D., Laake, J. & Gerber, L. R. Survival rates of the California sea lion, *Zalophus californianus*, in Mexico. *J. Mammal.* **89**, 1059–1066 (2008).
62. Mar, K. U. in *Giants on our Hands: Proceedings of the International Workshop on the Domesticated Asian Elephant* 195–211 (I. Baker, M. Kashio, 2002).
63. Moss, C. J. The demography of an African elephant (*Loxodonta africana*) population in Amboseli, Kenya. *J. Zool.* **255**, 145–156 (2001).
64. Laws, R. M. Dentition and ageing of the hippopotamus. *Afr. J. Ecol.* **6**, 19–52 (1968).
65. Krausman, P. R. & Morales, S. M. *Acinonyx jubatus*. *Mamm. Species* 1–6 (2005).
66. Bro-Jørgensen, J. The intensity of sexual selection predicts weapon size in male bovids. *Evolution* **61**, 1316–1326 (2007).
67. Sand, H. Åkan, Cederlund, G. & Danell, K. Geographical and latitudinal variation in growth patterns and adult body size of Swedish moose (*Alces alces*). *Oecologia* **102**, 433–442 (1995).
68. Loison, A., Gaillard, J.-M., Pélabon, C. & Yoccoz, N. G. What factors shape sexual size dimorphism in ungulates? *Evol. Ecol. Res.* **1**, 611–633 (1999).
69. Wickens, P. & York, A. E. Comparative population dynamics of fur seals. *Mar. Mammal Sci.* **13**, 241–292 (1997).
70. Bro-Jørgensen, J. Longevity in bovids is promoted by sociality, but reduced by sexual selection. *PLOS ONE* **7**, e45769 (2012).
71. Plard, F., Bonenfant, C. & Gaillard, J.-M. Revisiting the allometry of antlers among deer species: male-male sexual competition as a driver. *Oikos* **120**, 601–606 (2011).
72. Silva, M. & Downing, J. A. *CRC Handbook of Mammalian Body Masses*. (1995).
73. Mysterud, A. The relationship between ecological segregation and sexual body size dimorphism in large herbivores. *Oecologia* **124**, 40–54 (2000).
74. Ruckstuhl, K. E. & Neuhaus, P. Sexual segregation in ungulates: a comparative test of three hypotheses. *Biol. Rev.* **77**, 77–96 (2002).
75. Weckerly, F. W. Sexual-size dimorphism: influence of mass and mating systems in the most dimorphic mammals. *J. Mammal.* **79**, 33–52 (1998).
76. Carranza, J. Sexual selection for male body mass and the evolution of litter size in mammals. *Am. Nat.* **148**, 81–100 (1996).
77. Ward, O. G. & Wurster-Hill, D. H. *Nyctereutes procyonoides*. *Mamm. Species* **358**, 1–5 (1990).
78. Wilson, D. E. & Mittermeier, R. A. *Handbook of the Mammals of the World - Carnivores*. **1**, (Don E. Wilson, Russell A. Mittermeier, 2009).

**Table S3:** Model selection (model retained in bold) for each survival and actuarial senescence metric for the effect of data quality and body mass. P-values in bold indicate a statistically significant difference between competing models. A G-test was performed in each case.

|                            |         | <b>N species</b> | <b>Models compared</b>                               | <b>p-value</b>        |
|----------------------------|---------|------------------|------------------------------------------------------|-----------------------|
| <b>Longevity</b>           | Males   | 53               | full model vs. model 2<br><b>model 2</b> vs. model 3 | 0.221<br><b>0.015</b> |
|                            | Females | 58               | full model vs. model 2<br><b>model 2</b> vs. model 3 | 0.104<br><b>0.003</b> |
| <b>Baseline mortality</b>  | Males   | 51               | full model vs. model 2<br><b>model 2</b> vs. model 3 | 0.533<br><b>0.009</b> |
|                            | Females | 56               | full model vs. model 2<br><b>model 2</b> vs. model 3 | 0.515<br><b>0.016</b> |
| <b>Onset of senescence</b> | Males   | 51               | full model vs. model 2<br><b>model 2</b> vs. model 3 | 0.602<br><b>0.002</b> |
|                            | Females | 56               | full model vs. model 2<br>model 2 vs. <b>model 3</b> | 0.482<br>0.091        |
| <b>Rate of senescence</b>  | Males   | 45               | full model vs. model 2<br>model 2 vs. <b>model 3</b> | 0.728<br>0.199        |
|                            | Females | 48               | full model vs. model 2<br>model 2 vs. <b>model 3</b> | 0.591<br>0.078        |

full model: Zoo ~ Wild + Body mass + Wild\*Data quality  
model 2: Zoo ~Wild + Body mass  
model 3: Zoo ~Wild

**Table S4:** Parameter estimates from the selected model to assess the effect of data quality and body mass on the relationship between zoo and wild values of survival and actuarial senescence for 59 mammalian species.

|                            | Sex     | Method | Variables | $\beta$ | 95%CI         | t      | Adjusted-R <sup>2</sup> | $\lambda$ | 95%CI       |
|----------------------------|---------|--------|-----------|---------|---------------|--------|-------------------------|-----------|-------------|
| <b>Longevity</b>           | Males   | PGLS   | Intercept | 0.820   | 0.646;0.993   | 9.26   | 0.45                    | 0.657     | 0.281;0.922 |
|                            |         |        | Wild      | 0.140   | -0.008;0.288  | 1.85   |                         |           |             |
|                            |         |        | Body mass | 0.109   | 0.064;0.153   | 4.78   |                         |           |             |
|                            | Females | PGLS   | Intercept | 1.023   | 0.765;1.282   | 7.75   | 0.28                    | 0.989     | 0.593;1     |
|                            |         |        | Wild      | -0.066  | -0.196;0.064  | -1.00  |                         |           |             |
|                            |         |        | Body mass | 0.123   | 0.072;0.174   | 4.72   |                         |           |             |
| <b>Baseline mortality</b>  | Males   | PGLS   | Intercept | -0.636  | -1.207;-0.064 | -2.18  |                         | > 0.999   | 0.405;1     |
|                            |         |        | Wild      | -0.001  | -0.039;0.038  | -0.03  |                         |           |             |
|                            |         |        | Body mass | -0.201  | -0.304;-0.098 | -3.83  |                         |           |             |
|                            | Females | PGLS   | Intercept | -0.816  | -1.273;-0.359 | -3.50  |                         | 0.992     | 0.760;1     |
|                            |         |        | Wild      | -0.028  | -0.112;0.056  | -0.65  |                         |           |             |
|                            |         |        | Body mass | -0.167  | -0.250;-0.083 | -3.91  |                         |           |             |
| <b>Onset of senescence</b> | Males   | LM     | Intercept | 0.217   | 0.104;0.329   | 3.78   | 0.54                    | < 0.001   | 0;0.524     |
|                            |         |        | Wild      | 0.390   | 0.207;0.574   | 4.17   |                         |           |             |
|                            |         |        | Body mass | 0.135   | 0.080;0.191   | 4.76   |                         |           |             |
|                            | Females | LM     | Intercept | 0.489   | 0.196;0.782   | 3.27   | 0.14                    | 0.325     | 0;0.754     |
|                            |         |        | Wild      | 0.327   | 0.123;0.532   | 3.14   |                         |           |             |
|                            |         |        |           |         |               |        |                         |           |             |
| <b>Rate of senescence</b>  | Males   | LM     | Intercept | -0.946  | -1.130;-0.762 | -10.06 | 0.06                    | 0.412     | 0;0.954     |
|                            |         |        | Wild      | 0.186   | 0.001;0.372   | 1.97   |                         |           |             |
|                            | Females | LM     | Intercept | -1.137  | -1.326;-0.949 | -11.82 | -0.02                   | 0.483     | 0;0.872     |
|                            |         |        | Wild      | 0.005   | -0.178;0.188  | 0.06   |                         |           |             |

**Table S5:** Parameter estimates from the selected model to assess the relationship between zoo and wild values of survival and senescence for 59 mammalian species. Survival and actuarial senescence metric of captive ruminants are corrected for the percentage of grass in species' natural diet. Estimates obtained from models with or without the correction for captive ruminant species are similar.

|                            | Sex                          | Method | Variables | $\beta$ | 95%CI         | t      | Adjusted-R <sup>2</sup> | $\lambda$ | 95%CI       |
|----------------------------|------------------------------|--------|-----------|---------|---------------|--------|-------------------------|-----------|-------------|
| <b>Longevity</b>           | Males<br><i>53 species</i>   | PGLS   | Intercept | 0.816   | 0.617;1.014   | 8.06   | 0.40                    | 0.677     | 0.265;0.961 |
|                            |                              |        | Wild      | 0.138   | -0.029;0.305  | 1.62   |                         |           |             |
|                            |                              |        | Body mass | 0.113   | 0.062;0.163   | 4.39   |                         |           |             |
|                            | Females<br><i>58 species</i> | PGLS   | Intercept | 1.082   | 0.776;1.388   | 6.93   | 0.43                    | > 0.999   | 0.889;1     |
|                            |                              |        | Wild      | -0.162  | -0.279;-0.004 | -2.70  |                         |           |             |
|                            |                              |        | Body mass | 0.158   | 0.111;0.205   | 6.56   |                         |           |             |
| <b>Baseline mortality</b>  | Males<br><i>51 species</i>   | PGLS   | Intercept | -0.833  | -1.501;-0.165 | -2.45  |                         | > 0.999   | 0.875;1     |
|                            | Females<br><i>56 species</i> | PGLS   | Intercept | -0.928  | -1.527;-0.329 | -3.04  |                         | > 0.999   | 0.984;1     |
| <b>Onset of senescence</b> | Males<br><i>51 species</i>   | LM     | Intercept | 0.217   | 0.105;0.329   | 3.79   | 0.54                    | < 0.001   | 0;0.531     |
|                            |                              |        | Wild      | 0.389   | 0.206;0.572   | 4.17   |                         |           |             |
|                            |                              |        | Body mass | 0.135   | 0.080;0.191   | 4.78   |                         |           |             |
|                            | Females<br><i>56 species</i> | PGLS   | Intercept | 0.489   | 0.193;0.786   | 3.23   |                         | 0.525     | 0.069;0.851 |
| <b>Rate of senescence</b>  | Males<br><i>45 species</i>   | LM     | Intercept | -1.101  | -1.190;-1.013 | -24.30 |                         | 0.565     | 0;0.983     |
|                            | Females<br><i>48 species</i> | PGLS   | Intercept | -1.120  | -1.232;-1.009 | -19.73 |                         | 0.373     | 0.006;0.794 |

**Fig. S1.** Phylogenetic tree built on the 59 mammalian species analyzed (based on Bininda-Emonds (2007, 2008)'s phylogenetic super-tree) according to species-specific mean adult body mass (in kg).

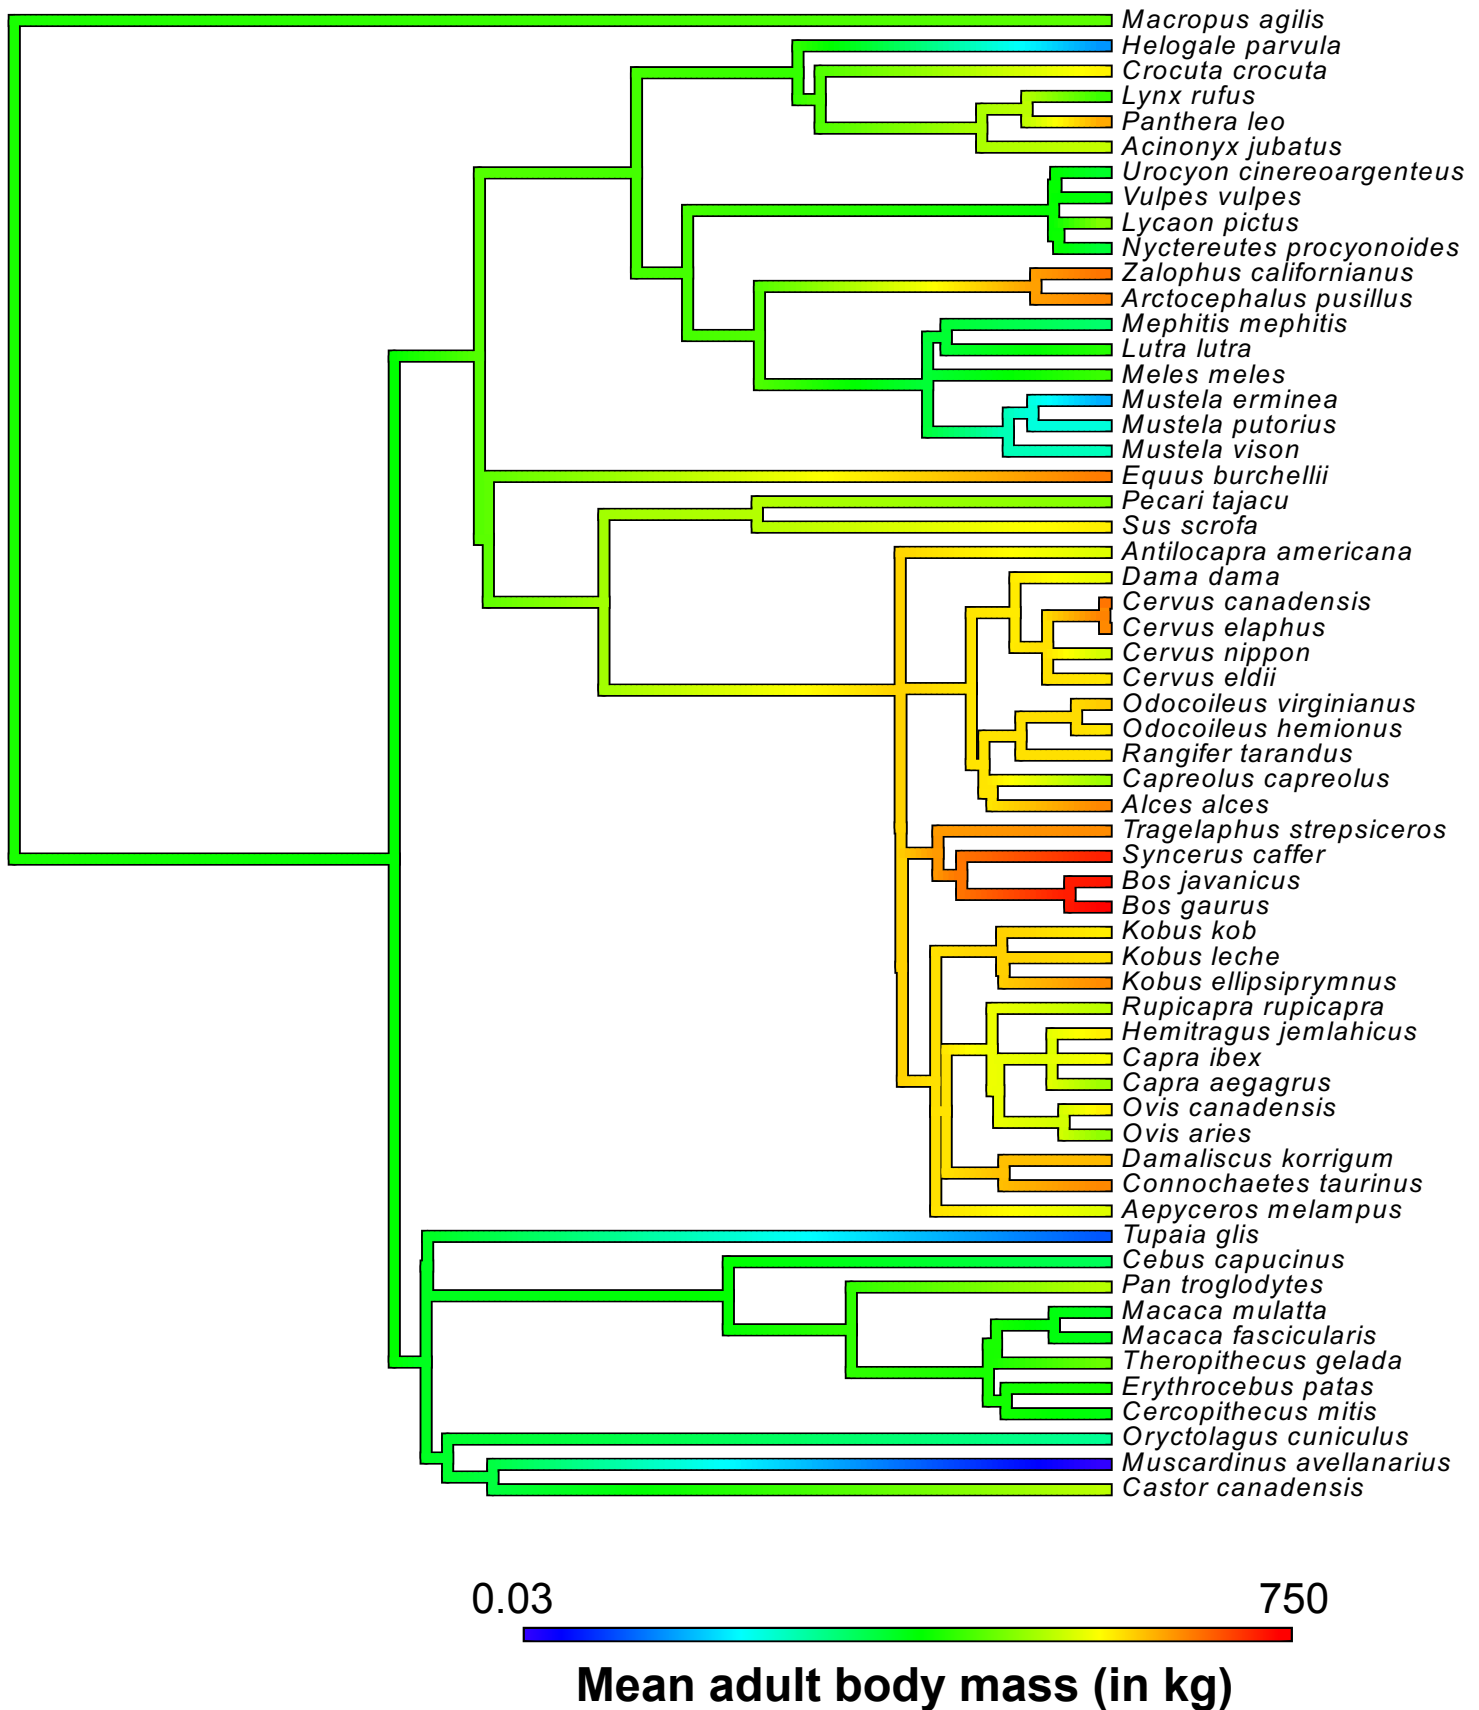

**Figure S2.** Onset of senescence in free-ranging and zoo conditions for males (triangles) and females (circles) of each species of Artiodactyla, Carnivora, Primates and other orders (Diprotodontia, Lagomorpha, Perissodactyla, Rodentia and Scandentia). Species senescing later in zoos are indicated with solid lines and species senescing earlier in zoos are indicated with dotted lines.

Onset of senescence according to environmental condition for Artiodactyla species (in years)

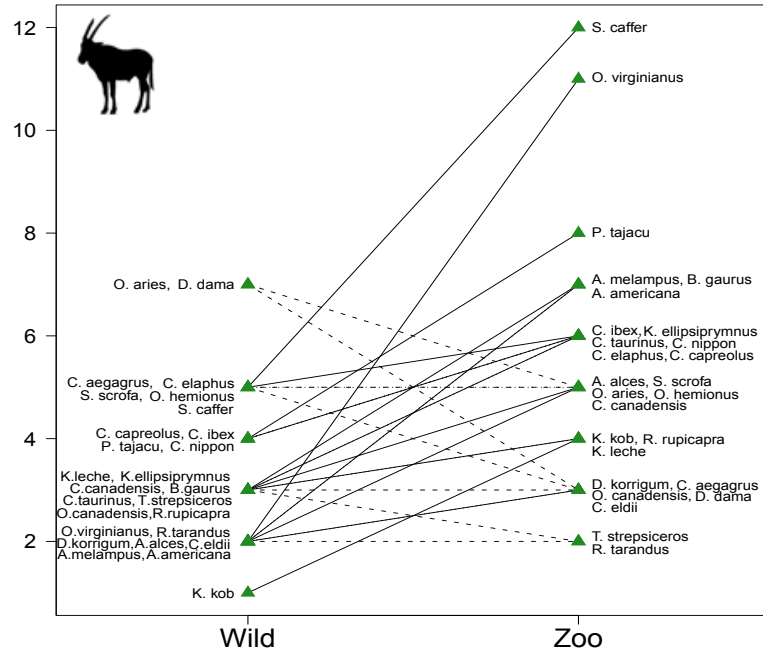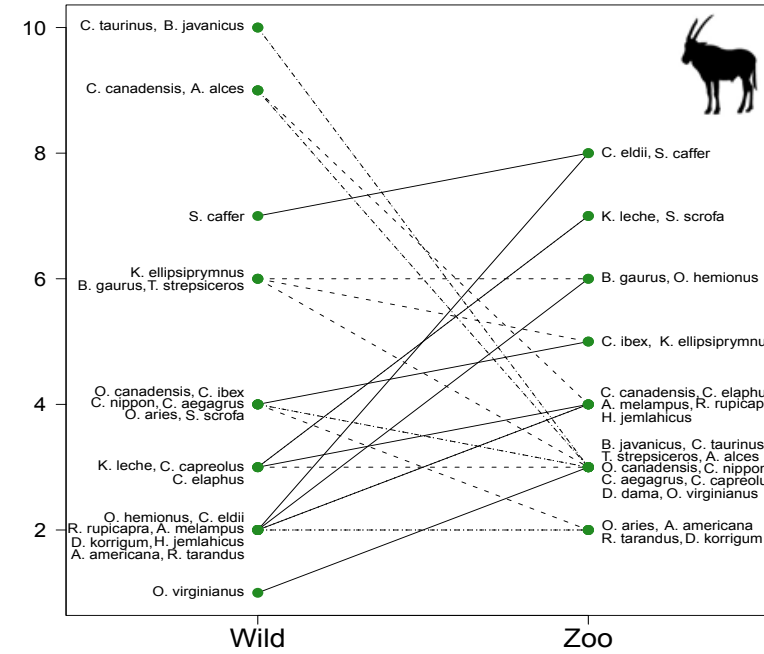

Onset of senescence according to environmental condition for Carnivora species (in years)

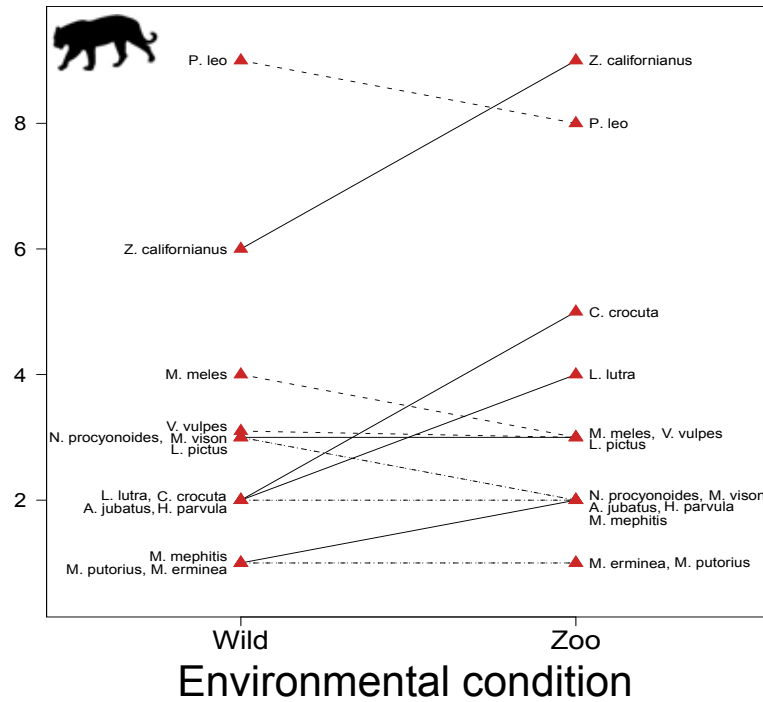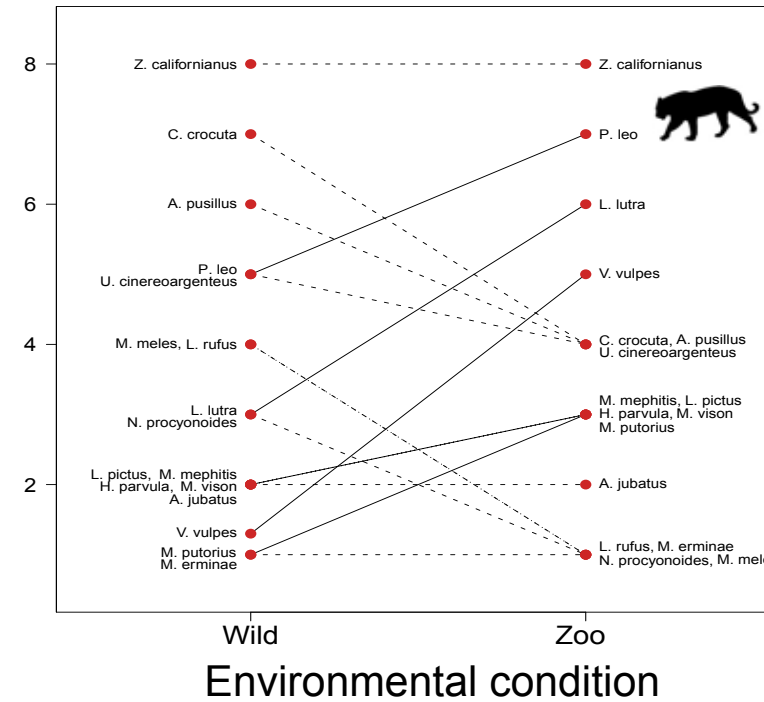

Onset of senescence according to environmental condition for Primates species (in years)

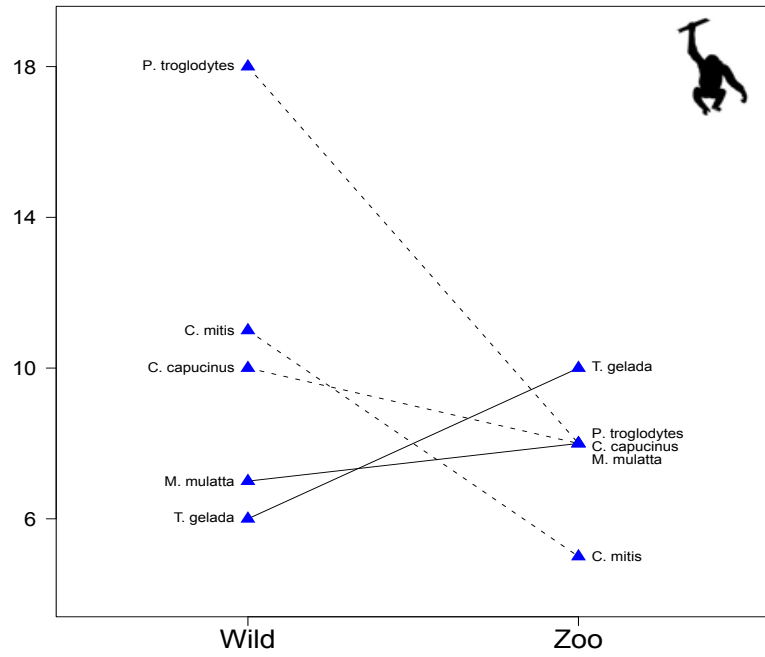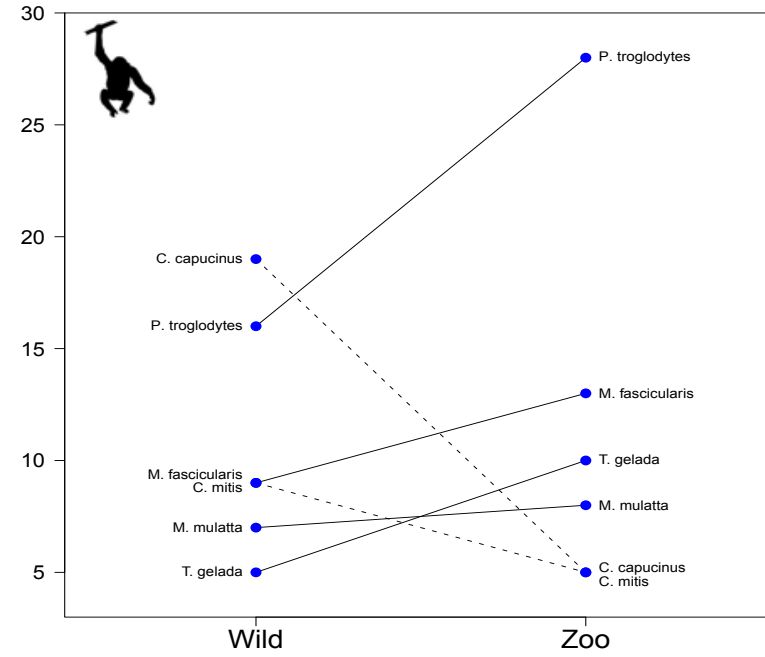

Onset of senescence according to environmental condition for other species (in years)

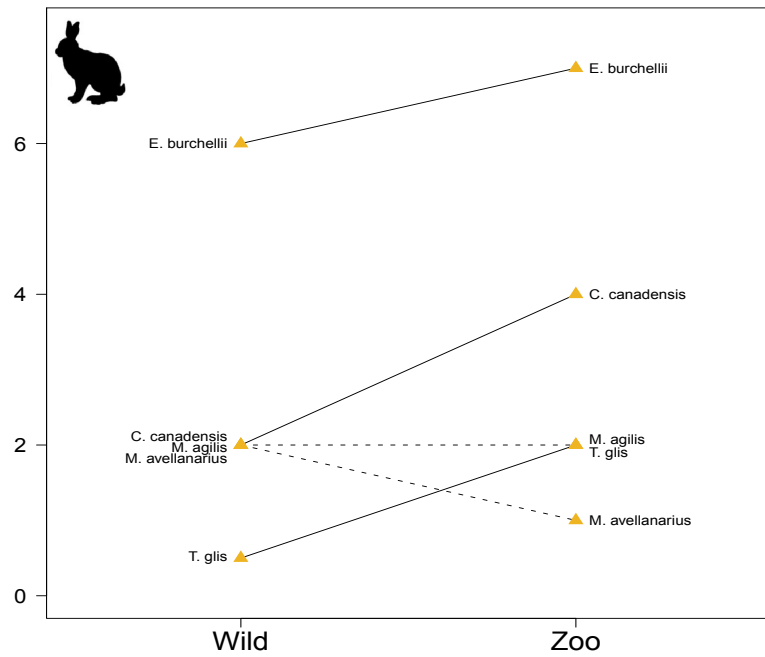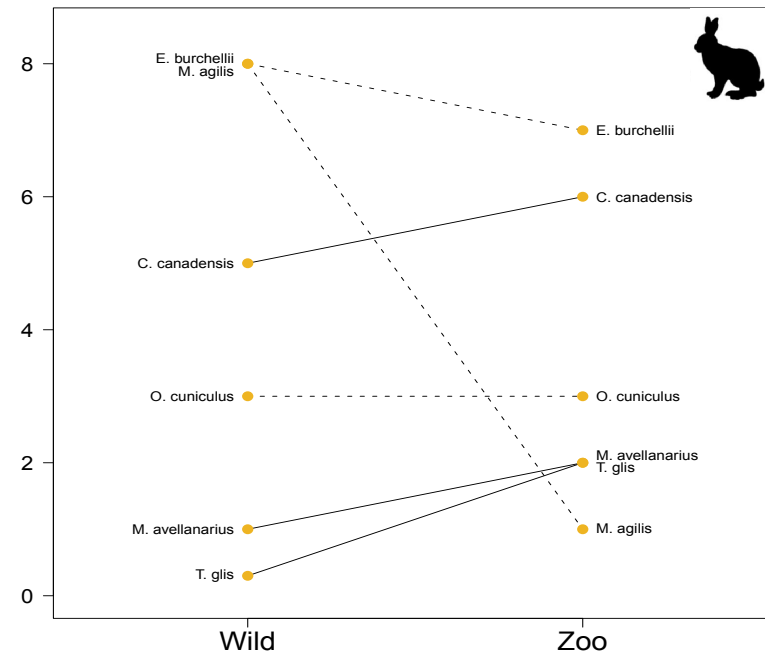

Environmental condition

Environmental condition

**Figure S3.** Baseline annual mortality in free-ranging and zoo conditions for males (triangles) and females (circles) of each species of Artiodactyla, Carnivora, Primates and other orders (Diprotodontia, Lagomorpha, Perissodactyla, Rodentia and Scandentia). Species having a lower baseline mortality in zoos are indicated with solid lines and species having a higher baseline mortality in zoos are indicated with dotted lines.

Baseline mortality according to environmental condition for Artiodactyla species

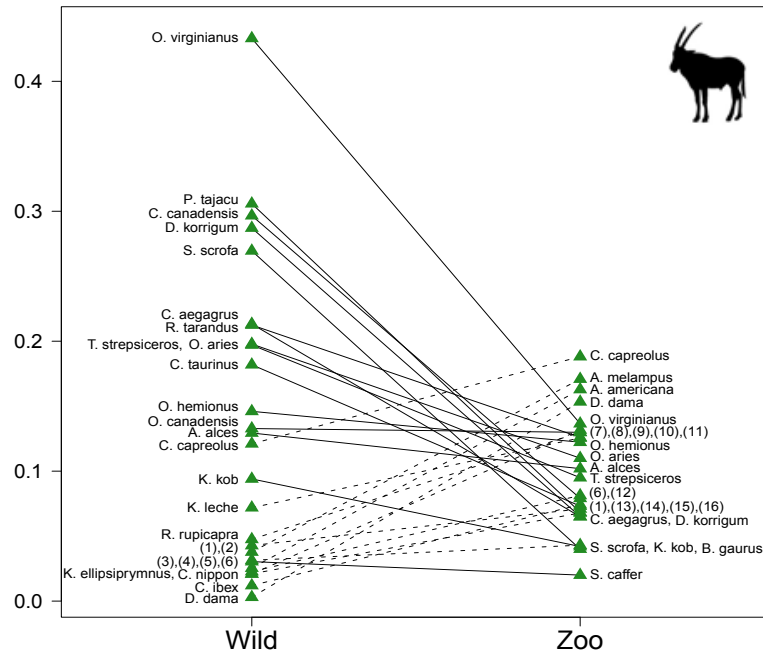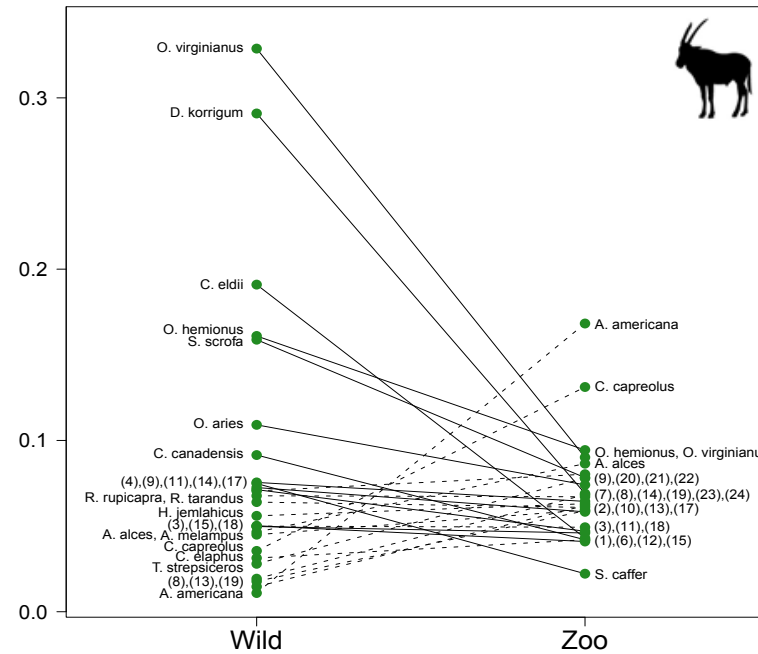

Baseline mortality according to environmental condition for Carnivora species

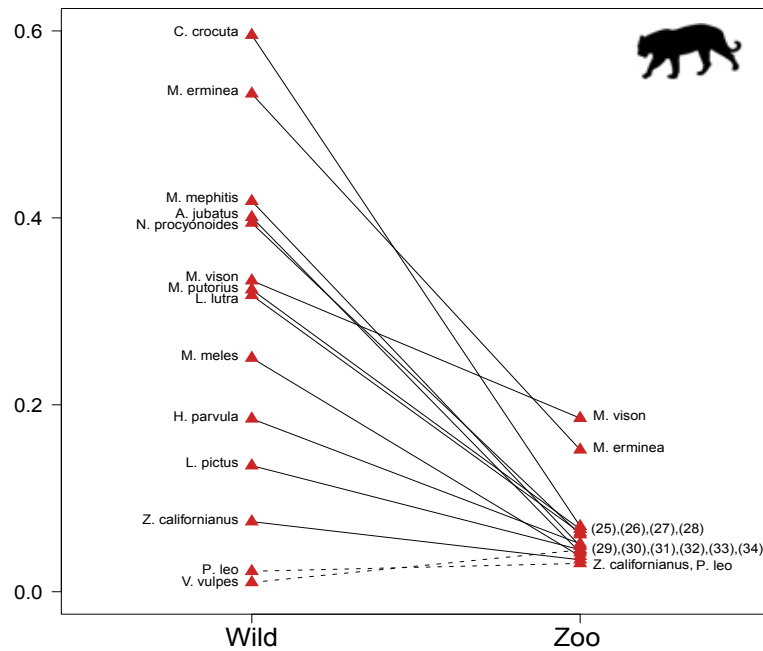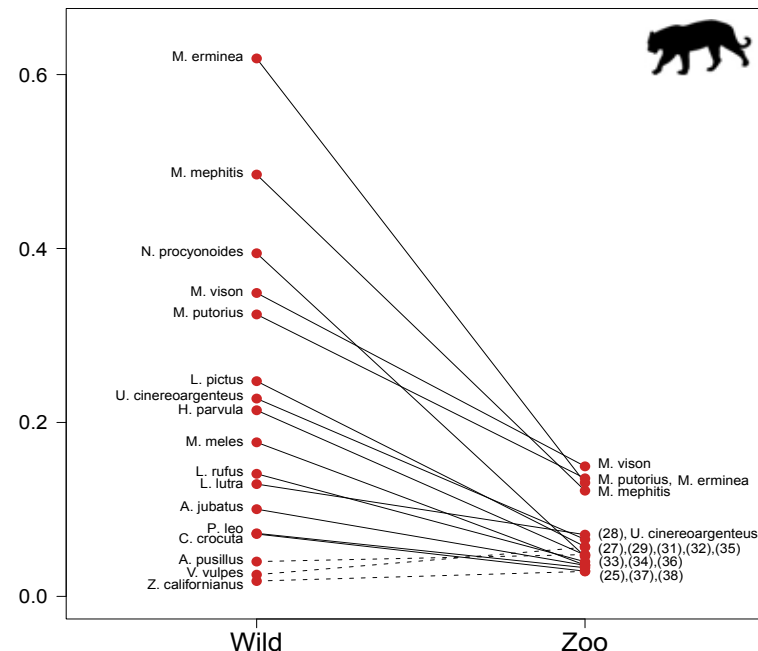

- (1) *C. eldii*
- (2) *A. melampus*
- (3) *B. gaurus*
- (4) *S. caffer*
- (5) *A. americana*
- (6) *C. elaphus*
- (7) *R. rupicapra*
- (8) *C. nippon*
- (9) *O. canadensis*
- (10) *R. tarandus*
- (11) *K. leche*
- (12) *C. canadensis*
- (13) *C. ibex*
- (14) *C. taurinus*
- (15) *K. ellipsiprymnus*
- (16) *P. tajacu*
- (17) *C. aegagrus*
- (18) *B. javanicus*
- (19) *D. dama*
- (20) *T. strepsiceros*
- (21) *S. scrofa*
- (22) *O. aries*
- (23) *D. korrigum*
- (24) *H. jemlahicus*
- (25) *C. crocuta*
- (26) *M. putorius*
- (27) *N. procyonoides*
- (28) *L. lutra*
- (29) *H. parvula*
- (30) *M. mephitis*
- (31) *V. vulpes*
- (32) *L. pictus*
- (33) *A. jubatus*
- (34) *M. meles*
- (35) *A. pusillus*
- (36) *L. rufus*
- (37) *P. leo*
- (38) *Z. californianus*

Environmental condition

Environmental condition



Baseline mortality according to environmental condition for Primates species

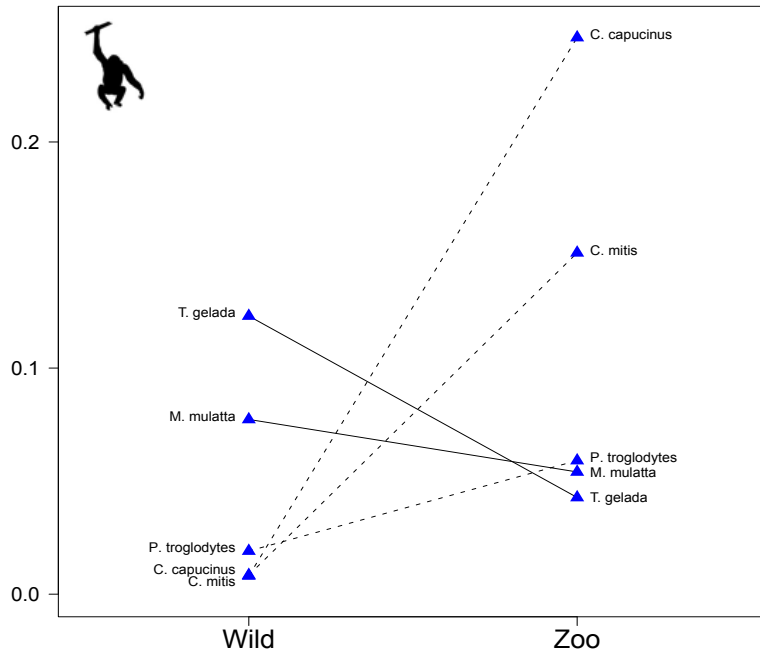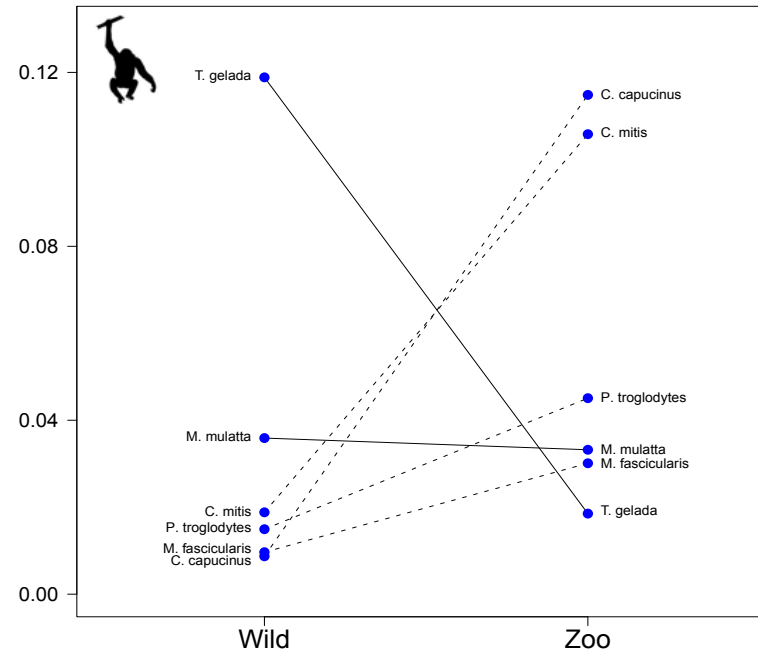

Baseline mortality according to environmental condition for other species

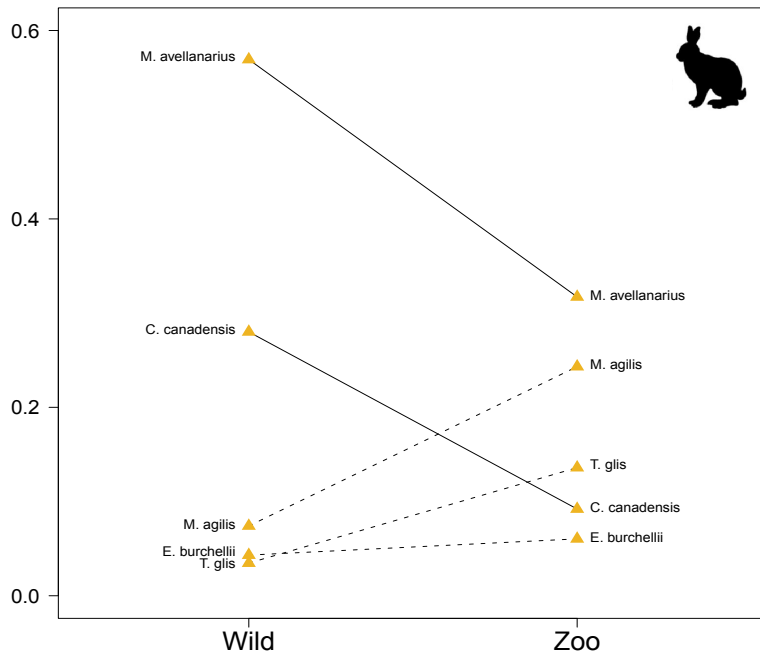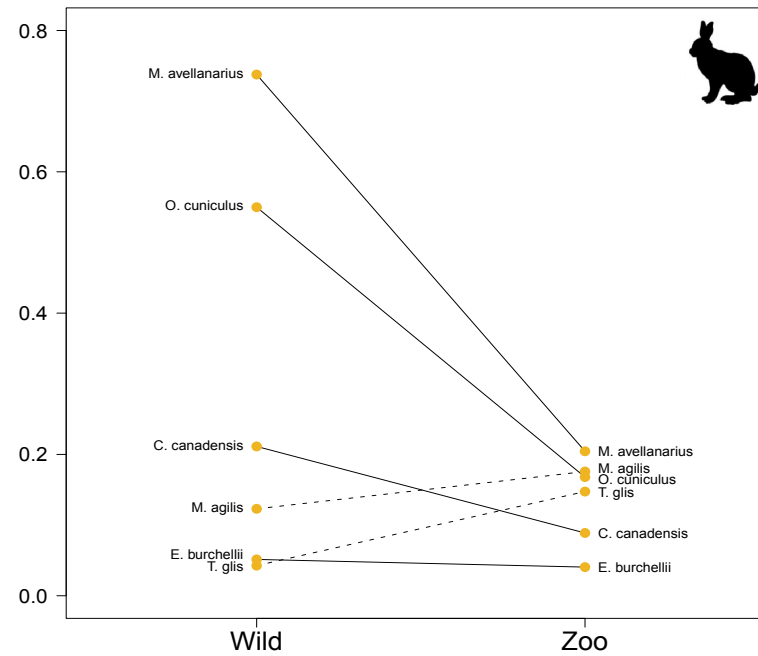

Environmental condition

Environmental condition

**Figure S4.** Rate of senescence in free-ranging and zoo conditions for males (triangles) and females (circles) of each species of Artiodactyla, Carnivora and other orders (Diprotodontia, Lagomorpha, Perissodactyla, Rodentia and Scandentia). Species senescing slower in zoos are indicated with solid lines and species senescing faster in zoos are indicated with dotted lines.

Rate of senescence according to environmental condition for Artiodactyla species

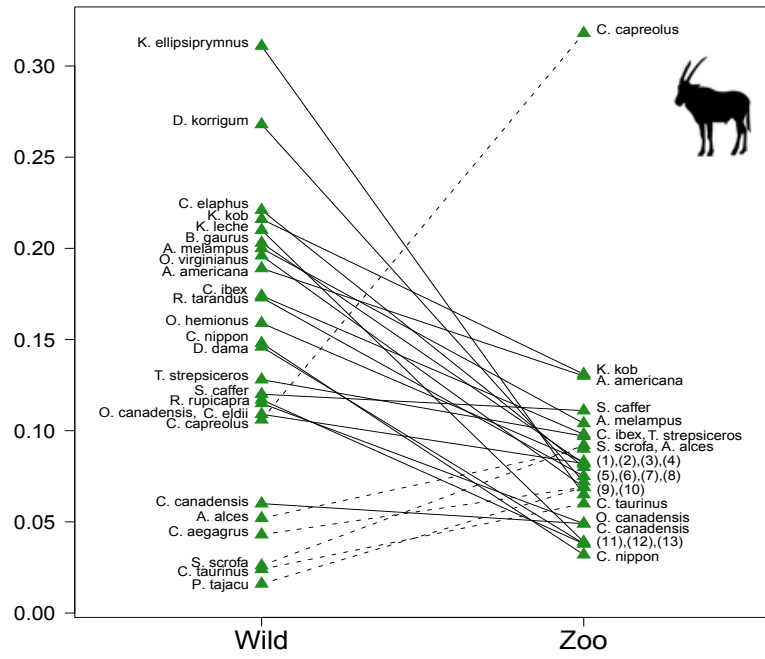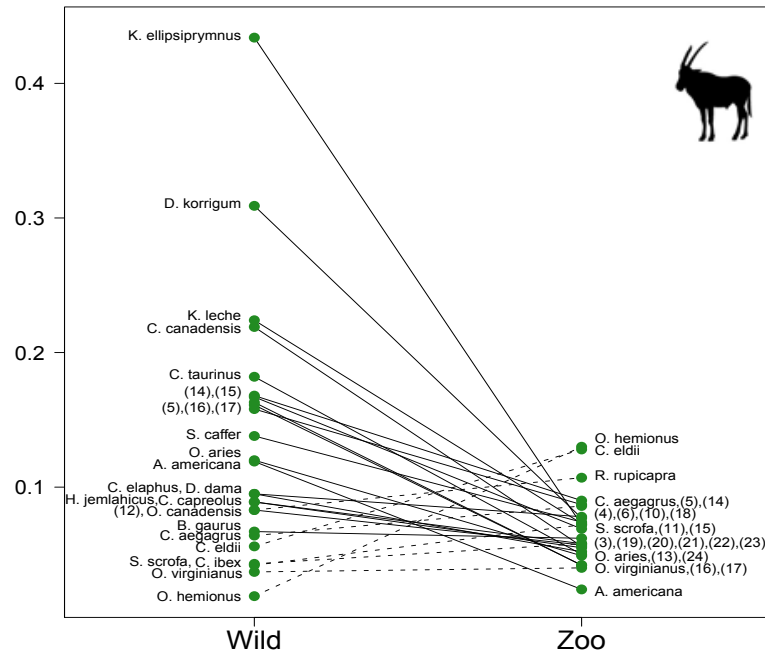

- (1) *O. hemionus*
- (2) *C. eldii*
- (3) *B. gaurus*
- (4) *C. elaphus*
- (5) *R. tarandus*
- (6) *D. korrigum*
- (7) *P. tajacu*
- (8) *O. virginianus*
- (9) *C. aegagrus*
- (10) *K. ellipsiprymnus*
- (11) *K. leche*
- (12) *R. rupicapra*
- (13) *D. dama*
- (14) *A. melampus*
- (15) *T. strepsiceros*
- (16) *A. alces*
- (17) *C. nippon*
- (18) *S. caffer*
- (19) *C. capreolus*
- (20) *C. ibex*
- (21) *O. canadensis*
- (22) *H. jemlahicus*
- (23) *C. canadensis*
- (24) *C. taurinus*
- (25) *A. jubatus*
- (26) *M. meles*
- (27) *P. leo*
- (28) *M. erminea*
- (29) *H. parvula*
- (30) *L. lutra*

Rate of senescence according to environmental condition for Carnivora species

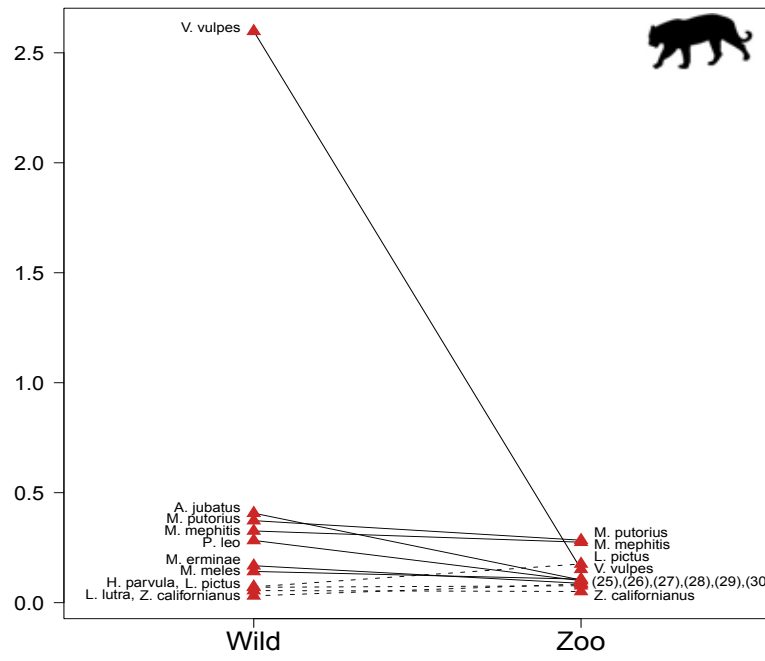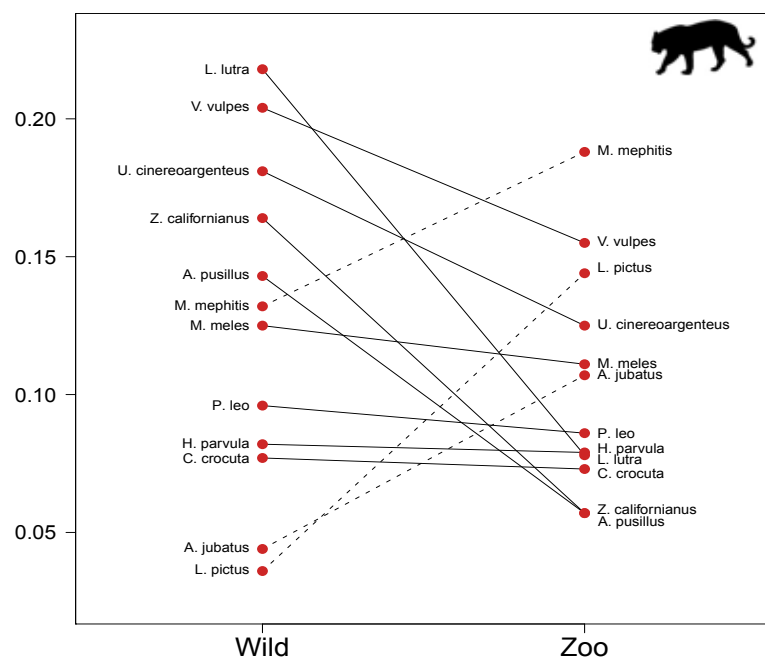

Environmental condition

Rate of senescence according to environmental condition for Primates species

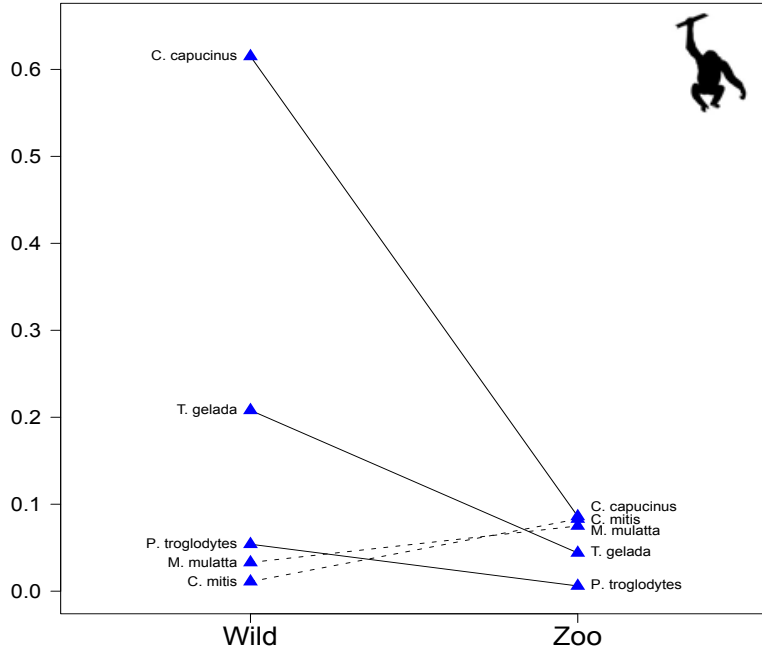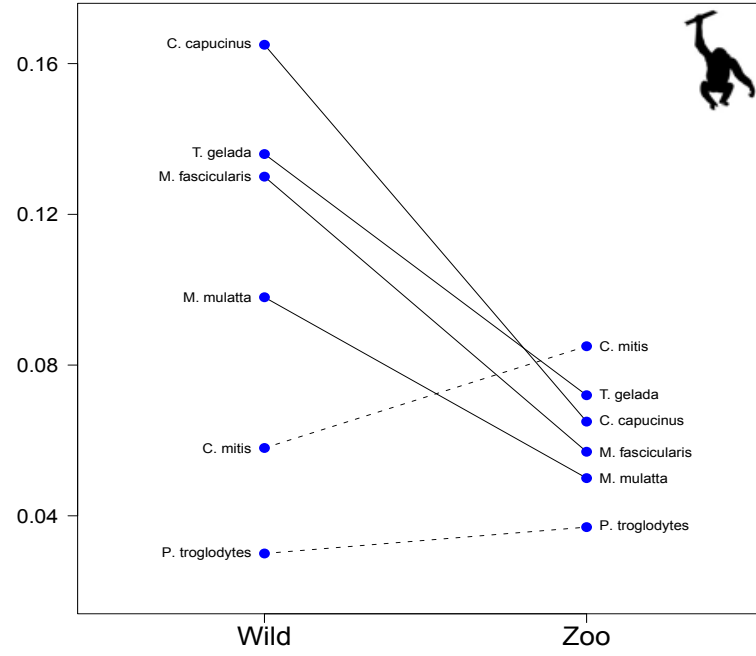

Rate of senescence according to environmental condition for other species

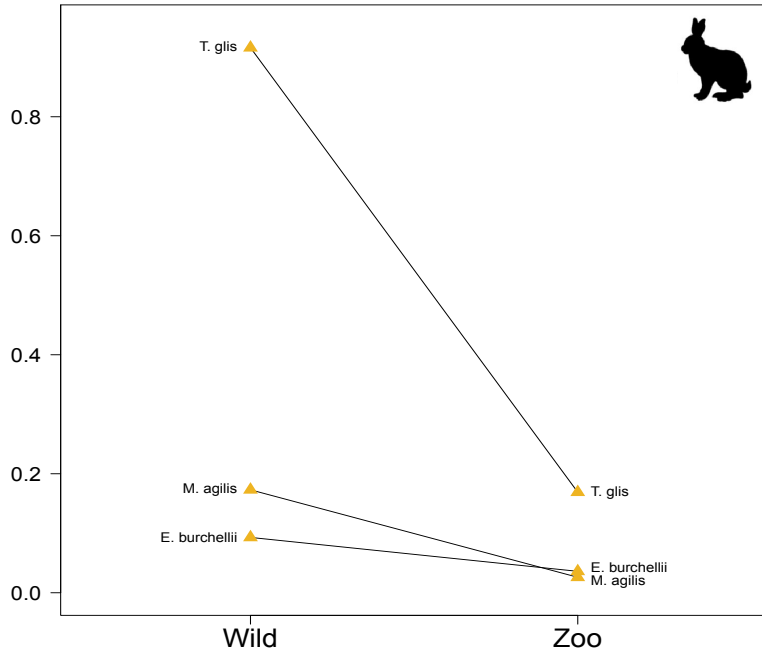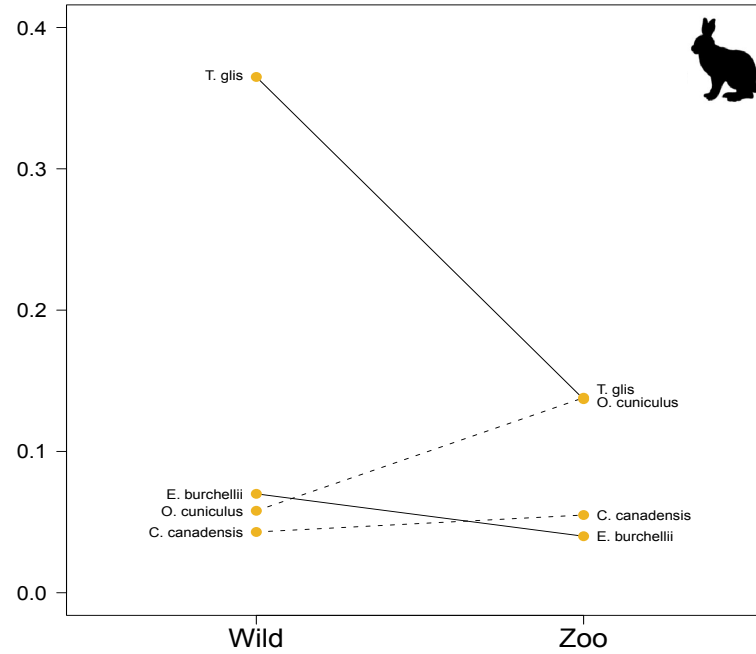

Environmental condition

Environmental condition
